# Supplementary material
Source: publisher figshare collection journal article supplement (https://geolsoc.figshare.com/ndownloader/files/33897013)
Supplement: Supplementary file 1 [file 33897013]

## Sheet: Preservation-Data
Nr	ID	Location	sample level	Nummulites species	Member-Formation	NP-zone	Mg/Ca mmol/mol	Sr/Ca mmol/mol	Fe/Ca mmol/mol	Mn/Ca mmol/mol	Al/Ca mmol/mol	Temperature (°C)	Nummulites/per ICP-OES sample
1	N-4	Ampe Quarry (Belgium)	Falun II	Nummulites aquitanicus	Egem Mbr - Hyon Fm	Top NP12	73.0329	1.93322	5.72125	1.20419	DL	25.7498	1
2	N-96	Ampe Quarry (Belgium)	Falun II	Nummulites aquitanicus	Egem Mbr - Hyon Fm	Top NP12	77.7355	2.14297	12.5413	1.20436	DL	29.1598	1
3	N-68	Ampe Quarry (Belgium)	Falun II	Nummulites aquitanicus	Egem Mbr - Hyon Fm	Top NP12	79.9435	2.11665	5.80818	1.43183	0.151382	30.6903	1
4	N-69	Ampe Quarry (Belgium)	Falun II	Nummulites aquitanicus	Egem Mbr - Hyon Fm	Top NP12	80.4266	2.11293	6.10586	1.32511	0.0957248	31.0195	1
5	N-140	Ampe Quarry (Belgium)	Falun II	Nummulites aquitanicus	Egem Mbr - Hyon Fm	Top NP12	76.5127	1.94875	6.40139	2.00704	0.170435	28.2933	1
6	N215	Ampe Quarry (Belgium)	Falun II	Nummulites aquitanicus	Egem Mbr - Hyon Fm	Top NP12	84.2708	1.98786	6.59399	1.39725	0.141485	33.5709	1
7	N216	Ampe Quarry (Belgium)	Falun II	Nummulites aquitanicus	Egem Mbr - Hyon Fm	Top NP12	77.3943	1.8661	3.81626	1.31444	DL	28.9194	1
8	N217	Ampe Quarry (Belgium)	Falun II	Nummulites aquitanicus	Egem Mbr - Hyon Fm	Top NP12	75.5625	1.85541	24.6839	1.08383	DL	27.6105	1
9	N-127	Ampe Quarry (Belgium)	Layer Nr17	Nummulites aquitanicus	Egem Mbr - Hyon Fm	Top NP12	76.8784	2.06757	33.6686	1.93167	0.185784	28.5539	1
10	N-128	Ampe Quarry (Belgium)	Layer Nr17	Nummulites aquitanicus	Egem Mbr - Hyon Fm	Top NP12	76.1429	1.95812	14.1072	1.65713	0.0977197	28.0286	1
11	N-129	Ampe Quarry (Belgium)	Layer Nr17	Nummulites aquitanicus	Egem Mbr - Hyon Fm	Top NP12	81.0435	2.02467	9.55469	1.84061	0.205228	31.4371	1
12	N218	Ampe Quarry (Belgium)	Layer Nr17	Nummulites aquitanicus	Egem Mbr - Hyon Fm	Top NP12	81.9745	1.85694	18.3655	1.94284	0.496814	32.0612	1
13	N219	Ampe Quarry (Belgium)	Layer Nr17	Nummulites aquitanicus	Egem Mbr - Hyon Fm	Top NP12	79.3296	1.81168	41.7018	1.58255	0.453697	30.269	1
14	N220	Ampe Quarry (Belgium)	Layer Nr17	Nummulites aquitanicus	Egem Mbr - Hyon Fm	Top NP12	76.5124	1.89478	37.2997	1.8747	0.315449	28.2931	1
15	N-3	Ampe Quarry (Belgium)	Falun I	Nummulites aquitanicus	Egem Mbr - Hyon Fm	Top NP12	71.2895	1.9304	6.45799	2.34777	DL	24.4295	1
16	N-95	Ampe Quarry (Belgium)	Falun I	Nummulites aquitanicus	Egem Mbr - Hyon Fm	Top NP12	80.1116	1.97138	9.05316	2.07173	0.209161	30.805	1
17	N-64	Ampe Quarry (Belgium)	Falun I	Nummulites aquitanicus	Egem Mbr - Hyon Fm	Top NP12	74.9502	1.96907	39.1314	2.06105	0.219716	27.1659	1
18	N-65	Ampe Quarry (Belgium)	Falun I	Nummulites aquitanicus	Egem Mbr - Hyon Fm	Top NP12	75.4147	1.82601	5.7532	2.28411	0.0802289	27.5035	1
19	N-139	Ampe Quarry (Belgium)	Falun I	Nummulites aquitanicus	Egem Mbr - Hyon Fm	Top NP12	75.124	1.87409	12.0335	1.47504	0.0545378	27.2924	1
20	N212	Ampe Quarry (Belgium)	Falun I	Nummulites aquitanicus	Egem Mbr - Hyon Fm	Top NP12	69.777	1.95652	11.9565	2.2478	DL	23.2577	1
21	N213	Ampe Quarry (Belgium)	Falun I	Nummulites aquitanicus	Egem Mbr - Hyon Fm	Top NP12	77.902	1.8246	9.18938	2.84684	DL	29.2767	1
22	A1	Ampe Quarry (Belgium)	Falun II	Nummulites aquitanicus	Egem Mbr - Hyon Fm	Top NP12	81.1192	1.83172	8.52831	2.03478	0.19021	31.488	1
23	A2	Ampe Quarry (Belgium)	Falun II	Nummulites aquitanicus	Egem Mbr - Hyon Fm	Top NP12	83.5628	1.77417	3.62438	1.65875	0.156972	33.1098	1
24	A3	Ampe Quarry (Belgium)	Falun II	Nummulites aquitanicus	Egem Mbr - Hyon Fm	Top NP12	80.0611	1.81475	5.76209	2.38623	0.225591	30.7706	1
25	A4	Ampe Quarry (Belgium)	Falun II	Nummulites aquitanicus	Egem Mbr - Hyon Fm	Top NP12	78.056	1.87877	14.5741	1.77585	0.217025	29.3846	1
26	A5	Ampe Quarry (Belgium)	Falun II	Nummulites aquitanicus	Egem Mbr - Hyon Fm	Top NP12	82.5853	1.816	9.09999	1.1909	0.207033	32.4668	1
27	A6	Ampe Quarry (Belgium)	Falun II	Nummulites aquitanicus	Egem Mbr - Hyon Fm	Top NP12	80.2452	1.92639	3.75686	1.01572	0.211455	30.8961	1
28	A7	Ampe Quarry (Belgium)	Falun II	Nummulites aquitanicus	Egem Mbr - Hyon Fm	Top NP12	77.1251	1.9396	4.49978	1.49081	0.236429	28.729	1
29	A8	Ampe Quarry (Belgium)	Falun II	Nummulites aquitanicus	Egem Mbr - Hyon Fm	Top NP12	82.1274	1.85002	3.53282	1.73246	0.231813	32.163	1
30	A9	Ampe Quarry (Belgium)	Falun II	Nummulites aquitanicus	Egem Mbr - Hyon Fm	Top NP12	80.4048	1.97391	6.43735	1.0787	0.22422	31.0046	1
31	A10	Ampe Quarry (Belgium)	Falun II	Nummulites aquitanicus	Egem Mbr - Hyon Fm	Top NP12	79.6505	1.9138	3.58024	1.28306	0.48876	30.4896	1
32	A11	Ampe Quarry (Belgium)	Falun II	Nummulites aquitanicus	Egem Mbr - Hyon Fm	Top NP12	76.6931	1.95243	2.76456	0.985264	0.303905	28.422	1
33	A12	Ampe Quarry (Belgium)	Falun II	Nummulites aquitanicus	Egem Mbr - Hyon Fm	Top NP12	74.7096	1.90844	3.67934	1.55059	0.424663	26.9902	1
34	A13	Ampe Quarry (Belgium)	Falun II	Nummulites aquitanicus	Egem Mbr - Hyon Fm	Top NP12	76.6641	1.8513	6.67573	2.21022	0.376319	28.4014	1
35	A14	Ampe Quarry (Belgium)	Falun II	Nummulites aquitanicus	Egem Mbr - Hyon Fm	Top NP12	76.1754	1.94861	5.7331	1.74019	0.502872	28.0519	1
36	A15	Ampe Quarry (Belgium)	Falun II	Nummulites aquitanicus	Egem Mbr - Hyon Fm	Top NP12	77.6709	1.98405	2.95193	1.37957	0.473793	29.1143	1
37	A16	Ampe Quarry (Belgium)	Falun II	Nummulites aquitanicus	Egem Mbr - Hyon Fm	Top NP12	77.0889	2.03006	12.1766	1.86413	0.587799	28.7033	1
38	A17	Ampe Quarry (Belgium)	Falun II	Nummulites aquitanicus	Egem Mbr - Hyon Fm	Top NP12	79.506	2.05426	3.88724	1.6843	0.502604	30.3904	1
39	A18	Ampe Quarry (Belgium)	Falun II	Nummulites aquitanicus	Egem Mbr - Hyon Fm	Top NP12	78.1429	2.017	3.2458	1.01414	1.11651	29.4454	1
40	A19	Ampe Quarry (Belgium)	Falun II	Nummulites aquitanicus	Egem Mbr - Hyon Fm	Top NP12	78.9196	1.98674	6.37827	1.30885	1.69712	29.9859	1
41	A20	Ampe Quarry (Belgium)	Falun II	Nummulites aquitanicus	Egem Mbr - Hyon Fm	Top NP12	75.2582	1.96977	3.16123	1.32861	0.381129	27.39	1
42	A21	Ampe Quarry (Belgium)	Falun II	Nummulites aquitanicus	Egem Mbr - Hyon Fm	Top NP12	81.7489	1.94569	3.72699	1.22736	0.199575	31.9106	1
43	A22	Ampe Quarry (Belgium)	Falun II	Nummulites aquitanicus	Egem Mbr - Hyon Fm	Top NP12	71.6531	1.9179	5.61704	1.60188	0.261751	24.7075	1
44	A23	Ampe Quarry (Belgium)	Falun II	Nummulites aquitanicus	Egem Mbr - Hyon Fm	Top NP12	75.5565	1.93467	4.55772	1.59946	1.14838	27.6061	1
45	A24	Ampe Quarry (Belgium)	Falun II	Nummulites aquitanicus	Egem Mbr - Hyon Fm	Top NP12	80.3158	1.87793	9.03551	1.21171	0.227877	30.9442	1
46	A25	Ampe Quarry (Belgium)	Falun II	Nummulites aquitanicus	Egem Mbr - Hyon Fm	Top NP12	77.015	1.96832	2.39742	0.758162	0.573513	28.6509	1
47	A26	Ampe Quarry (Belgium)	Falun II	Nummulites aquitanicus	Egem Mbr - Hyon Fm	Top NP12	74.8473	1.92797	5.25712	2.10621	0.472239	27.0908	1
48	A27	Ampe Quarry (Belgium)	Falun II	Nummulites aquitanicus	Egem Mbr - Hyon Fm	Top NP12	78.6952	1.92909	3.00739	1.26843	0.24433	29.8302	1
49	A28	Ampe Quarry (Belgium)	Falun II	Nummulites aquitanicus	Egem Mbr - Hyon Fm	Top NP12	78.1454	1.92617	-0.791019	-0.0569295	-0.0408212	29.4471	1
50	A29	Ampe Quarry (Belgium)	Falun II	Nummulites aquitanicus	Egem Mbr - Hyon Fm	Top NP12	79.969	1.89882	-0.440945	-0.0560009	-0.0438302	30.7077	1
51	A30	Ampe Quarry (Belgium)	Falun II	Nummulites aquitanicus	Egem Mbr - Hyon Fm	Top NP12	76.81	1.9395	-0.705027	-0.0731477	-0.0611617	28.5053	1
52	A31	Ampe Quarry (Belgium)	Falun II	Nummulites aquitanicus	Egem Mbr - Hyon Fm	Top NP12	81.6465	1.87008	-0.420244	-0.0609256	-0.0408579	31.8421	1
53	A32	Ampe Quarry (Belgium)	Falun II	Nummulites aquitanicus	Egem Mbr - Hyon Fm	Top NP12	77.7175	1.96148	-0.661228	-0.0534124	-0.0467958	29.1471	1
54	A33	Ampe Quarry (Belgium)	Falun II	Nummulites aquitanicus	Egem Mbr - Hyon Fm	Top NP12	82.2921	1.82614	-0.541151	-0.0649116	-0.041421	32.2725	1
55	A34	Ampe Quarry (Belgium)	Falun II	Nummulites aquitanicus	Egem Mbr - Hyon Fm	Top NP12	73.9188	2.07013	-0.803841	-0.0792564	-0.0915301	26.4086	1
56	A35	Ampe Quarry (Belgium)	Falun II	Nummulites aquitanicus	Egem Mbr - Hyon Fm	Top NP12	76.6427	1.88241	-0.594204	-0.0516661	-0.0403351	28.3861	1
57	A36	Ampe Quarry (Belgium)	Falun II	Nummulites aquitanicus	Egem Mbr - Hyon Fm	Top NP12	70.6079	1.90637	-1.25207	-0.0744558	-0.0747607	23.9045	1
58	A37	Ampe Quarry (Belgium)	Falun II	Nummulites aquitanicus	Egem Mbr - Hyon Fm	Top NP12	79.8735	1.93313	-0.581725	-0.0534945	-0.0445824	30.6424	1
59	A38	Ampe Quarry (Belgium)	Falun II	Nummulites aquitanicus	Egem Mbr - Hyon Fm	Top NP12	77.6807	1.92303	-1.16321	-0.057725	-0.0473748	29.1213	1
60	A39	Ampe Quarry (Belgium)	Falun II	Nummulites aquitanicus	Egem Mbr - Hyon Fm	Top NP12	73.7973	1.90377	-0.493826	-0.0751037	-0.0776934	26.3188	1
61	A40	Ampe Quarry (Belgium)	Falun II	Nummulites aquitanicus	Egem Mbr - Hyon Fm	Top NP12	72.3989	1.95602	-0.480258	-0.0664475	-0.0684796	25.2733	1
62	A41	Ampe Quarry (Belgium)	Falun II	Nummulites aquitanicus	Egem Mbr - Hyon Fm	Top NP12	78.4586	1.91924	-0.784525	-0.0556881	-0.0440865	29.6657	1
63	A42	Ampe Quarry (Belgium)	Falun II	Nummulites aquitanicus	Egem Mbr - Hyon Fm	Top NP12	73.873	1.96273	-0.785589	-0.0718428	-0.0759851	26.3748	1
64	A141	Ampe Quarry (Belgium)	Falun II	Nummulites aquitanicus	Egem Mbr - Hyon Fm	Top NP12	77.9986	1.97067	3.60181	1.13707	0.0713176	29.3444	1
65	A142	Ampe Quarry (Belgium)	Falun II	Nummulites aquitanicus	Egem Mbr - Hyon Fm	Top NP12	80.4937	2.00887	7.86194	1.3934	DL	31.0651	1
66	A143	Ampe Quarry (Belgium)	Falun II	Nummulites aquitanicus	Egem Mbr - Hyon Fm	Top NP12	76.4349	2.06358	7.90142	1.15968	0.0859075	28.2377	1
67	A144	Ampe Quarry (Belgium)	Falun II	Nummulites aquitanicus	Egem Mbr - Hyon Fm	Top NP12	73.4775	2.01317	6.13522	1.90059	0.0819372	26.0815	1
68	A145	Ampe Quarry (Belgium)	Falun II	Nummulites aquitanicus	Egem Mbr - Hyon Fm	Top NP12	74.347	1.94411	2.2455	1.3113	0.0518077	26.7243	1
69	A146	Ampe Quarry (Belgium)	Falun II	Nummulites aquitanicus	Egem Mbr - Hyon Fm	Top NP12	82.2881	1.96942	14.2849	1.47158	0.0741088	32.2699	1
70	A148	Ampe Quarry (Belgium)	Falun II	Nummulites aquitanicus	Egem Mbr - Hyon Fm	Top NP12	75.3954	1.95172	3.93407	2.35615	0.121568	27.4895	1
71	A149	Ampe Quarry (Belgium)	Falun II	Nummulites aquitanicus	Egem Mbr - Hyon Fm	Top NP12	71.9343	1.92517	3.75307	2.09866	0.0819565	24.9216	1
72	A150	Ampe Quarry (Belgium)	Falun II	Nummulites aquitanicus	Egem Mbr - Hyon Fm	Top NP12	78.5799	2.02056	15.6125	1.45662	0.0656964	29.7501	1
73	A151	Ampe Quarry (Belgium)	Falun II	Nummulites aquitanicus	Egem Mbr - Hyon Fm	Top NP12	75.1577	1.92063	3.94755	1.60145	0.115305	27.3169	1
74	A152	Ampe Quarry (Belgium)	Falun II	Nummulites aquitanicus	Egem Mbr - Hyon Fm	Top NP12	75.446	1.91939	12.4382	1.80319	0.0643115	27.5262	1
75	A153	Ampe Quarry (Belgium)	Falun II	Nummulites aquitanicus	Egem Mbr - Hyon Fm	Top NP12	76.866	1.96714	13.6618	1.26183	0.101693	28.5451	1
76	A154	Ampe Quarry (Belgium)	Falun II	Nummulites aquitanicus	Egem Mbr - Hyon Fm	Top NP12	73.95	2.05362	2.56837	1.68663	0.0821572	26.4318	1
77	A155	Ampe Quarry (Belgium)	Falun II	Nummulites aquitanicus	Egem Mbr - Hyon Fm	Top NP12	76.61	2.07096	7.24983	1.555	0.104092	28.3628	1
78	A156	Ampe Quarry (Belgium)	Falun II	Nummulites aquitanicus	Egem Mbr - Hyon Fm	Top NP12	76.5027	1.93941	5.63824	0.990136	0.0709943	28.2862	1
79	A157	Ampe Quarry (Belgium)	Falun II	Nummulites aquitanicus	Egem Mbr - Hyon Fm	Top NP12	78.3334	1.93614	8.1584	1.18064	0.0719882	29.5785	1
80	A158	Ampe Quarry (Belgium)	Falun II	Nummulites aquitanicus	Egem Mbr - Hyon Fm	Top NP12	78.1387	1.98761	6.21369	1.47782	0.0708102	29.4425	1
81	A159	Ampe Quarry (Belgium)	Falun II	Nummulites aquitanicus	Egem Mbr - Hyon Fm	Top NP12	78.5519	2.03889	3.9604	1.07936	0.0536816	29.7307	1
82	A160	Ampe Quarry (Belgium)	Falun II	Nummulites aquitanicus	Egem Mbr - Hyon Fm	Top NP12	74.49	1.97631	4.67027	1.43732	0.0785542	26.8293	1
83	A161	Ampe Quarry (Belgium)	Falun II	Nummulites aquitanicus	Egem Mbr - Hyon Fm	Top NP12	73.2464	1.9776	6.21721	1.36616	0.0730627	25.9094	1
84	A162	Ampe Quarry (Belgium)	Falun II	Nummulites aquitanicus	Egem Mbr - Hyon Fm	Top NP12	78.5199	1.93369	2.34868	1.05432	0.0811706	29.7084	1
85	A163	Ampe Quarry (Belgium)	Falun II	Nummulites aquitanicus	Egem Mbr - Hyon Fm	Top NP12	74.5938	1.89036	4.14806	1.64587	0.0485211	26.9054	1
86	A164	Ampe Quarry (Belgium)	Falun II	Nummulites aquitanicus	Egem Mbr - Hyon Fm	Top NP12	76.3478	1.91575	2.60182	0.922913	0.0750253	28.1754	1
87	A165	Ampe Quarry (Belgium)	Falun II	Nummulites aquitanicus	Egem Mbr - Hyon Fm	Top NP12	76.8498	1.93071	6.39742	1.43316	0.0950435	28.5336	1
88	A166	Ampe Quarry (Belgium)	Falun II	Nummulites aquitanicus	Egem Mbr - Hyon Fm	Top NP12	74.9886	1.96914	2.83563	1.37055	0.0624294	27.1939	1
89	A167	Ampe Quarry (Belgium)	Falun II	Nummulites aquitanicus	Egem Mbr - Hyon Fm	Top NP12	76.1697	1.9404	5.58823	1.27602	0.0883672	28.0478	1
90	A168	Ampe Quarry (Belgium)	Falun II	Nummulites aquitanicus	Egem Mbr - Hyon Fm	Top NP12	78.0544	1.94939	3.47902	0.996876	0.0595917	29.3835	1
91	A169	Ampe Quarry (Belgium)	Falun II	Nummulites aquitanicus	Egem Mbr - Hyon Fm	Top NP12	76.7304	1.89488	3.55636	1.60214	0.0698655	28.4486	1
92	A170	Ampe Quarry (Belgium)	Falun II	Nummulites aquitanicus	Egem Mbr - Hyon Fm	Top NP12	76.844	1.93885	3.30058	1.39964	0.037988	28.5294	1
93	A171	Ampe Quarry (Belgium)	Falun II	Nummulites aquitanicus	Egem Mbr - Hyon Fm	Top NP12	77.3588	1.96131	3.34066	1.33817	0.074746	28.8943	1
94	A172	Ampe Quarry (Belgium)	Falun II	Nummulites aquitanicus	Egem Mbr - Hyon Fm	Top NP12	78.0038	1.92749	3.65711	1.33504	DL	29.3481	1
95	A173	Ampe Quarry (Belgium)	Falun II	Nummulites aquitanicus	Egem Mbr - Hyon Fm	Top NP12	76.2949	1.96035	5.73311	0.659542	0.0710331	28.1376	1
96	A174	Ampe Quarry (Belgium)	Falun II	Nummulites aquitanicus	Egem Mbr - Hyon Fm	Top NP12	74.6217	1.93106	3.26653	1.44916	0.0638891	26.9259	1
97	A175	Ampe Quarry (Belgium)	Falun II	Nummulites aquitanicus	Egem Mbr - Hyon Fm	Top NP12	76.5209	1.93376	8.22754	0.921786	0.0573729	28.2992	1
98	A176	Ampe Quarry (Belgium)	Falun II	Nummulites aquitanicus	Egem Mbr - Hyon Fm	Top NP12	76.0133	1.92911	3.38274	1.13491	0.0574845	27.9355	1
99	A177	Ampe Quarry (Belgium)	Falun II	Nummulites aquitanicus	Egem Mbr - Hyon Fm	Top NP12	74.6309	1.91127	7.35553	1.67962	0.0727973	26.9325	1
100	A178	Ampe Quarry (Belgium)	Falun II	Nummulites aquitanicus	Egem Mbr - Hyon Fm	Top NP12	75.8496	1.92402	2.8245	1.09042	0.111483	27.8177	1
101	A179	Ampe Quarry (Belgium)	Falun II	Nummulites aquitanicus	Egem Mbr - Hyon Fm	Top NP12	77.2223	1.92998	5.49777	1.11838	DL	28.7978	1
102	A180	Ampe Quarry (Belgium)	Falun II	Nummulites aquitanicus	Egem Mbr - Hyon Fm	Top NP12	77.5895	1.94425	3.59101	1.12753	0.0751784	29.057	1
103	A181	Ampe Quarry (Belgium)	Falun II	Nummulites aquitanicus	Egem Mbr - Hyon Fm	Top NP12	72.6107	1.93683	6.0943	1.48066	0.0499919	25.433	1
104	79a	Ampe Quarry (Belgium)	Falun II	Nummulites aquitanicus	Egem Mbr - Hyon Fm	Top NP12	78.1652	1.91254	5.05052	1.36834	0.0740332	29.461	1
105	80a	Ampe Quarry (Belgium)	Falun II	Nummulites aquitanicus	Egem Mbr - Hyon Fm	Top NP12	80.377	1.87546	2.46699	1.20755	0.0363584	30.9858	1
106	86a	Ampe Quarry (Belgium)	Falun II	Nummulites aquitanicus	Egem Mbr - Hyon Fm	Top NP12	84.767	1.94135	5.88936	1.11158	0.106212	33.8917	1
107	87a	Ampe Quarry (Belgium)	Falun II	Nummulites aquitanicus	Egem Mbr - Hyon Fm	Top NP12	80.1408	1.93012	6.8657	0.845441	0.0663357	30.825	1
108	88a	Ampe Quarry (Belgium)	Falun II	Nummulites aquitanicus	Egem Mbr - Hyon Fm	Top NP12	81.7922	1.77928	4.83604	2.13719	0.163363	31.9396	1
109	89a	Ampe Quarry (Belgium)	Falun II	Nummulites aquitanicus	Egem Mbr - Hyon Fm	Top NP12	80.8798	1.95202	3.64954	1.23183	0.0608834	31.3265	1
110	90a	Ampe Quarry (Belgium)	Falun II	Nummulites aquitanicus	Egem Mbr - Hyon Fm	Top NP12	79.8634	1.9082	4.93233	1.22408	0.0762971	30.6355	1
111	D1	Ampe Quarry (Belgium)	Layer Nr17	Nummulites aquitanicus	Egem Mbr - Hyon Fm	Top NP12	70.816	1.91679	5.32973	3.57557	0.0557134	24.0654	1
112	D2	Ampe Quarry (Belgium)	Layer Nr17	Nummulites aquitanicus	Egem Mbr - Hyon Fm	Top NP12	72.7295	1.89518	14.9876	1.85571	0.0344015	25.5223	1
113	D3	Ampe Quarry (Belgium)	Layer Nr17	Nummulites aquitanicus	Egem Mbr - Hyon Fm	Top NP12	78.0663	1.91923	8.73393	1.81111	0.0416416	29.3918	1
114	D4	Ampe Quarry (Belgium)	Layer Nr17	Nummulites aquitanicus	Egem Mbr - Hyon Fm	Top NP12	72.184	1.92055	5.16073	1.84892	0.0373802	25.1109	1
115	D5	Ampe Quarry (Belgium)	Layer Nr17	Nummulites aquitanicus	Egem Mbr - Hyon Fm	Top NP12	73.4154	1.90739	4.66237	3.0253	0.0445604	26.0353	1
116	D6	Ampe Quarry (Belgium)	Layer Nr17	Nummulites aquitanicus	Egem Mbr - Hyon Fm	Top NP12	74.3036	1.92897	8.72358	1.26861	0.0415538	26.6924	1
117	D7	Ampe Quarry (Belgium)	Layer Nr17	Nummulites aquitanicus	Egem Mbr - Hyon Fm	Top NP12	71.9288	1.92548	21.2481	1.71229	0.0488083	24.9174	1
118	D8	Ampe Quarry (Belgium)	Layer Nr17	Nummulites aquitanicus	Egem Mbr - Hyon Fm	Top NP12	72.9882	1.96976	5.44217	1.64516	0.0641786	25.7164	1
119	D9	Ampe Quarry (Belgium)	Layer Nr17	Nummulites aquitanicus	Egem Mbr - Hyon Fm	Top NP12	70.9535	1.91224	5.56288	2.27252	0.0364887	24.1714	1
120	D10	Ampe Quarry (Belgium)	Layer Nr17	Nummulites aquitanicus	Egem Mbr - Hyon Fm	Top NP12	76.4284	1.91946	8.12764	2.25773	0.175507	28.2331	1
121	D11	Ampe Quarry (Belgium)	Layer Nr17	Nummulites aquitanicus	Egem Mbr - Hyon Fm	Top NP12	76.1313	1.94859	8.10135	1.2676	0.0409341	28.0202	1
122	D12	Ampe Quarry (Belgium)	Layer Nr17	Nummulites aquitanicus	Egem Mbr - Hyon Fm	Top NP12	70.594	1.91651	13.5926	1.30627	0.0417764	23.8938	1
123	D13	Ampe Quarry (Belgium)	Layer Nr17	Nummulites aquitanicus	Egem Mbr - Hyon Fm	Top NP12	76.7155	1.89138	4.65756	2.13155	0.0435813	28.438	1
124	D14	Ampe Quarry (Belgium)	Layer Nr17	Nummulites aquitanicus	Egem Mbr - Hyon Fm	Top NP12	74.3519	1.90871	4.88051	1.65326	0.0853956	26.7279	1
125	D15	Ampe Quarry (Belgium)	Layer Nr17	Nummulites aquitanicus	Egem Mbr - Hyon Fm	Top NP12	72.3825	1.92411	7.66695	2.63812	0.0651502	25.261	1
126	D16	Ampe Quarry (Belgium)	Layer Nr17	Nummulites aquitanicus	Egem Mbr - Hyon Fm	Top NP12	77.6299	1.94347	3.86275	1.8677	0.0220649	29.0855	1
127	D17	Ampe Quarry (Belgium)	Layer Nr17	Nummulites aquitanicus	Egem Mbr - Hyon Fm	Top NP12	79.4046	1.92014	4.7095	1.477	0.0414585	30.3206	1
128	D18	Ampe Quarry (Belgium)	Layer Nr17	Nummulites aquitanicus	Egem Mbr - Hyon Fm	Top NP12	75.5084	1.92266	4.82565	2.4028	0.0566983	27.5714	1
129	D19	Ampe Quarry (Belgium)	Layer Nr17	Nummulites aquitanicus	Egem Mbr - Hyon Fm	Top NP12	78.6854	1.92367	19.5034	2.55029	0.075745	29.8235	1
130	D20	Ampe Quarry (Belgium)	Layer Nr17	Nummulites aquitanicus	Egem Mbr - Hyon Fm	Top NP12	73.7409	1.92476	7.71408	1.55236	0.0651743	26.277	1
131	F1-1	Ampe Quarry (Belgium)	Falun I	Nummulites aquitanicus	Egem Mbr - Hyon Fm	Top NP12	70.0714	1.87278	8.07698	1.98654	0.0806803	23.4878	1
132	F1-2	Ampe Quarry (Belgium)	Falun I	Nummulites aquitanicus	Egem Mbr - Hyon Fm	Top NP12	73.42	1.8972	4.3859	1.58133	0.0422687	26.0387	1
133	F1-3	Ampe Quarry (Belgium)	Falun I	Nummulites aquitanicus	Egem Mbr - Hyon Fm	Top NP12	71.8808	1.86167	5.18527	2.35988	0.0387253	24.8809	1
134	F1-4	Ampe Quarry (Belgium)	Falun I	Nummulites aquitanicus	Egem Mbr - Hyon Fm	Top NP12	72.173	1.89692	12.4675	1.87846	0.0681592	25.1026	1
135	F1-5	Ampe Quarry (Belgium)	Falun I	Nummulites aquitanicus	Egem Mbr - Hyon Fm	Top NP12	73.467	1.93595	6.00592	2.23964	0.0485718	26.0736	1
136	F1-6	Ampe Quarry (Belgium)	Falun I	Nummulites aquitanicus	Egem Mbr - Hyon Fm	Top NP12	73.7584	1.88456	4.78369	1.86532	0.0473526	26.29	1
137	F1-7	Ampe Quarry (Belgium)	Falun I	Nummulites aquitanicus	Egem Mbr - Hyon Fm	Top NP12	75.0063	1.90565	14.3975	1.90043	0.0426631	27.2068	1
138	F1-8	Ampe Quarry (Belgium)	Falun I	Nummulites aquitanicus	Egem Mbr - Hyon Fm	Top NP12	75.1881	1.94534	15.3736	1.88205	0.0284267	27.339	1
139	F1-9	Ampe Quarry (Belgium)	Falun I	Nummulites aquitanicus	Egem Mbr - Hyon Fm	Top NP12	68.9377	1.8157	6.53585	3.56248	0.0710465	22.5964	1
140	F1-10	Ampe Quarry (Belgium)	Falun I	Nummulites aquitanicus	Egem Mbr - Hyon Fm	Top NP12	77.5698	1.92779	7.18511	2.02428	0.0207291	29.0432	1
141	F1-11	Ampe Quarry (Belgium)	Falun I	Nummulites aquitanicus	Egem Mbr - Hyon Fm	Top NP12	73.0851	1.8666	4.71402	2.35407	0.0401865	25.7889	1
142	F1-12	Ampe Quarry (Belgium)	Falun I	Nummulites aquitanicus	Egem Mbr - Hyon Fm	Top NP12	73.9653	1.87993	4.54266	1.76025	0.0471847	26.4431	1
143	F1-13	Ampe Quarry (Belgium)	Falun I	Nummulites aquitanicus	Egem Mbr - Hyon Fm	Top NP12	71.7222	1.92045	10.279	1.70808	0.0379326	24.7602	1
144	F1-14	Ampe Quarry (Belgium)	Falun I	Nummulites aquitanicus	Egem Mbr - Hyon Fm	Top NP12	76.2458	1.90656	17.1932	2.20151	0.0530548	28.1024	1
145	F1-15	Ampe Quarry (Belgium)	Falun I	Nummulites aquitanicus	Egem Mbr - Hyon Fm	Top NP12	73.0935	1.9391	40.8663	1.09752	0.0279653	25.7952	1
146	F1-16	Ampe Quarry (Belgium)	Falun I	Nummulites aquitanicus	Egem Mbr - Hyon Fm	Top NP12	76.5965	1.92017	6.51396	1.56218	0.0218016	28.3532	1
147	F1-17	Ampe Quarry (Belgium)	Falun I	Nummulites aquitanicus	Egem Mbr - Hyon Fm	Top NP12	73.5627	1.8876	5.93748	2.09288	0.041528	26.1448	1
148	F1-18	Ampe Quarry (Belgium)	Falun I	Nummulites aquitanicus	Egem Mbr - Hyon Fm	Top NP12	73.9562	1.88095	7.35052	2.10315	0.0227094	26.4363	1
149	F1-19	Ampe Quarry (Belgium)	Falun I	Nummulites aquitanicus	Egem Mbr - Hyon Fm	Top NP12	75.4211	1.94207	5.46063	1.57895	0.0265714	27.5081	1
150	F1-20	Ampe Quarry (Belgium)	Falun I	Nummulites aquitanicus	Egem Mbr - Hyon Fm	Top NP12	80.5406	1.88196	4.37275	2.30874	0.03115	31.0969	1
151	N354	Aizy-Jouy outcrop (France)	Haustator Bed	Nummulites planulatus	Sables de Pierrefonds - Cuise Fm	Base NP12	81.5051	1.8552	1.35049	0.200299	0.0629218	34.0736	1
152	N355	Aizy-Jouy outcrop (France)	Haustator Bed	Nummulites planulatus	Sables de Pierrefonds - Cuise Fm	Base NP12	78.226	1.91735	0.628794	0.105686	-0.0172957	31.8296	1
153	N356	Aizy-Jouy outcrop (France)	Haustator Bed	Nummulites planulatus	Sables de Pierrefonds - Cuise Fm	Base NP12	77.0708	1.91204	0.615214	0.115381	0.00394165	31.0167	1
154	N357	Aizy-Jouy outcrop (France)	Haustator Bed	Nummulites planulatus	Sables de Pierrefonds - Cuise Fm	Base NP12	81.6886	1.91683	0.512693	0.0945157	-0.0119029	34.1965	1
155	N358	Aizy-Jouy outcrop (France)	Haustator Bed	Nummulites planulatus	Sables de Pierrefonds - Cuise Fm	Base NP12	84.6505	1.90828	0.323968	0.0559087	-0.145803	36.1427	1
156	N359	Aizy-Jouy outcrop (France)	Haustator Bed	Nummulites planulatus	Sables de Pierrefonds - Cuise Fm	Base NP12	84.1519	1.87637	0.875091	0.112044	0.00710632	35.8199	1
157	N360	Aizy-Jouy outcrop (France)	Haustator Bed	Nummulites planulatus	Sables de Pierrefonds - Cuise Fm	Base NP12	76.3761	1.90887	0.957614	0.123098	0.0579621	30.5219	1
158	N361	Aizy-Jouy outcrop (France)	Haustator Bed	Nummulites planulatus	Sables de Pierrefonds - Cuise Fm	Base NP12	83.0349	1.83479	1.01704	0.0964457	0.170523	35.0897	1
159	N362	Aizy-Jouy outcrop (France)	Haustator Bed	Nummulites planulatus	Sables de Pierrefonds - Cuise Fm	Base NP12	82.3949	1.85894	1.34369	0.105232	0.00369858	34.6669	1
160	N363	Aizy-Jouy outcrop (France)	Haustator Bed	Nummulites planulatus	Sables de Pierrefonds - Cuise Fm	Base NP12	88.2228	1.88553	0.506611	0.0281542	-0.0471546	38.4014	1
161	N364	Aizy-Jouy outcrop (France)	Haustator Bed	Nummulites planulatus	Sables de Pierrefonds - Cuise Fm	Base NP12	82.5469	1.8817	3.70791	0.0903518	0.0669343	34.7676	1
162	N365	Aizy-Jouy outcrop (France)	Haustator Bed	Nummulites planulatus	Sables de Pierrefonds - Cuise Fm	Base NP12	80.2283	1.88658	2.11485	0.0862604	0.00596729	33.2108	1
163	N366	Aizy-Jouy outcrop (France)	Haustator Bed	Nummulites planulatus	Sables de Pierrefonds - Cuise Fm	Base NP12	83.5819	1.89474	0.428299	0.0682588	-0.0103545	35.4485	1
164	N367	Aizy-Jouy outcrop (France)	Haustator Bed	Nummulites planulatus	Sables de Pierrefonds - Cuise Fm	Base NP12	84.829	1.98797	3.83143	-0.0209127	0.0835336	36.2578	1
165	N368	Aizy-Jouy outcrop (France)	Haustator Bed	Nummulites planulatus	Sables de Pierrefonds - Cuise Fm	Base NP12	85.1488	1.99013	0.283017	DL	DL	36.4634	1
166	N369	Aizy-Jouy outcrop (France)	Haustator Bed	Nummulites planulatus	Sables de Pierrefonds - Cuise Fm	Base NP12	79.8339	1.86084	1.06072	0.0887425	0.0139293	32.9415	1
167	N370	Aizy-Jouy outcrop (France)	Haustator Bed	Nummulites planulatus	Sables de Pierrefonds - Cuise Fm	Base NP12	82.7845	1.90411	1.05599	0.0448095	0.0489293	34.9247	1
168	N371	Aizy-Jouy outcrop (France)	Haustator Bed	Nummulites planulatus	Sables de Pierrefonds - Cuise Fm	Base NP12	84.2439	1.90798	0.481338	0.0547299	0.0234529	35.8796	1
169	N372	Aizy-Jouy outcrop (France)	Haustator Bed	Nummulites planulatus	Sables de Pierrefonds - Cuise Fm	Base NP12	84.9195	1.91784	0.258091	0.00943216	-0.0229424	36.3161	1
170	N373	Aizy-Jouy outcrop (France)	Haustator Bed	Nummulites planulatus	Sables de Pierrefonds - Cuise Fm	Base NP12	82.7436	1.95469	0.535011	-0.0132673	-0.0021913	34.8977	1
171	N374	Aizy-Jouy outcrop (France)	Haustator Bed	Nummulites planulatus	Sables de Pierrefonds - Cuise Fm	Base NP12	80.1816	1.89443	0.348034	0.0599467	0.00639206	33.179	1
172	N375	Aizy-Jouy outcrop (France)	Haustator Bed	Nummulites planulatus	Sables de Pierrefonds - Cuise Fm	Base NP12	80.1113	1.95244	0.306832	0.0396083	0.0158289	33.1311	1
173	N376	Aizy-Jouy outcrop (France)	Haustator Bed	Nummulites planulatus	Sables de Pierrefonds - Cuise Fm	Base NP12	80.2065	1.91019	1.16262	0.0803924	0.0990722	33.1959	1
174	N377	Aizy-Jouy outcrop (France)	Haustator Bed	Nummulites planulatus	Sables de Pierrefonds - Cuise Fm	Base NP12	85.7418	1.92433	1.44431	0.0159803	0.0939104	36.8427	1
175	N378	Aizy-Jouy outcrop (France)	Haustator Bed	Nummulites planulatus	Sables de Pierrefonds - Cuise Fm	Base NP12	79.6607	2.01097	DL	-0.0758206	-0.104629	32.8228	1
176	N379	Aizy-Jouy outcrop (France)	Haustator Bed	Nummulites planulatus	Sables de Pierrefonds - Cuise Fm	Base NP12	82.2255	1.89184	0.291218	0.0766898	0.00566121	34.5544	1
177	N380	Aizy-Jouy outcrop (France)	Haustator Bed	Nummulites planulatus	Sables de Pierrefonds - Cuise Fm	Base NP12	79.0084	1.93017	0.456906	0.0486544	-0.0159459	32.3735	1
178	N381	Aizy-Jouy outcrop (France)	Haustator Bed	Nummulites planulatus	Sables de Pierrefonds - Cuise Fm	Base NP12	80.135	1.99542	0.544485	-0.0111844	-0.0840285	33.1472	1
179	N382	Aizy-Jouy outcrop (France)	Haustator Bed	Nummulites planulatus	Sables de Pierrefonds - Cuise Fm	Base NP12	84.2607	1.88568	DL	DL	-0.0770247	35.8905	1
180	6a	Aizy-Jouy outcrop (France)	Haustator Bed	Nummulites planulatus	Sables de Pierrefonds - Cuise Fm	Base NP12	83.9668	1.86945	1.07413	0.118518	0.0949754	35.6996	1
181	7a	Aizy-Jouy outcrop (France)	Haustator Bed	Nummulites planulatus	Sables de Pierrefonds - Cuise Fm	Base NP12	82.8483	1.91688	1.05254	0.123837	0.0596156	34.9668	1
182	8a	Aizy-Jouy outcrop (France)	Haustator Bed	Nummulites planulatus	Sables de Pierrefonds - Cuise Fm	Base NP12	80.9719	1.91155	1.62526	0.102811	0.106746	33.7149	1
183	9a	Aizy-Jouy outcrop (France)	Haustator Bed	Nummulites planulatus	Sables de Pierrefonds - Cuise Fm	Base NP12	82.3141	1.89179	0.791159	0.123812	0.0593516	34.6133	1
184	10a	Aizy-Jouy outcrop (France)	Haustator Bed	Nummulites planulatus	Sables de Pierrefonds - Cuise Fm	Base NP12	83.4257	1.93964	1.28746	0.130679	0.47496	35.3463	1
185	11a	Aizy-Jouy outcrop (France)	Haustator Bed	Nummulites planulatus	Sables de Pierrefonds - Cuise Fm	Base NP12	85.6605	1.92824	0.724732	0.0946324	0.0689573	36.7908	1
186	12a	Aizy-Jouy outcrop (France)	Haustator Bed	Nummulites planulatus	Sables de Pierrefonds - Cuise Fm	Base NP12	84.2573	1.90218	1.08755	0.142841	0.0957755	35.8883	1
187	13a	Aizy-Jouy outcrop (France)	Haustator Bed	Nummulites planulatus	Sables de Pierrefonds - Cuise Fm	Base NP12	83.3372	1.91143	1.32368	0.122129	0.0842443	35.2883	1
188	14a	Aizy-Jouy outcrop (France)	Haustator Bed	Nummulites planulatus	Sables de Pierrefonds - Cuise Fm	Base NP12	83.4834	1.94246	1.57652	0.140426	0.103069	35.3841	1
189	15a	Aizy-Jouy outcrop (France)	Haustator Bed	Nummulites planulatus	Sables de Pierrefonds - Cuise Fm	Base NP12	82.9846	1.92393	1.02797	0.131267	0.0741476	35.0566	1
190	16a	Aizy-Jouy outcrop (France)	Haustator Bed	Nummulites planulatus	Sables de Pierrefonds - Cuise Fm	Base NP12	80.3445	1.94064	0.944475	0.115258	0.0721288	33.2898	1
191	17a	Aizy-Jouy outcrop (France)	Haustator Bed	Nummulites planulatus	Sables de Pierrefonds - Cuise Fm	Base NP12	82.6973	1.91047	0.983777	0.108945	0.0580751	34.8671	1
192	18a	Aizy-Jouy outcrop (France)	Haustator Bed	Nummulites planulatus	Sables de Pierrefonds - Cuise Fm	Base NP12	86.1915	1.9717	0.715494	0.124145	0.0761469	37.1285	1
193	19a	Aizy-Jouy outcrop (France)	Haustator Bed	Nummulites planulatus	Sables de Pierrefonds - Cuise Fm	Base NP12	83.7267	1.98951	0.68633	0.127868	0.123303	35.5431	1
194	20a	Aizy-Jouy outcrop (France)	Haustator Bed	Nummulites planulatus	Sables de Pierrefonds - Cuise Fm	Base NP12	83.8071	1.89249	1.76336	0.131552	0.0825094	35.5956	1
195	26a	Aizy-Jouy outcrop (France)	Haustator Bed	Nummulites planulatus	Sables de Pierrefonds - Cuise Fm	Base NP12	78.2708	1.98043	0.881157	0.0998439	0.0688693	31.8609	1
196	27a	Aizy-Jouy outcrop (France)	Haustator Bed	Nummulites planulatus	Sables de Pierrefonds - Cuise Fm	Base NP12	82.7217	1.94144	1.10695	0.117215	0.0622162	34.8832	1
197	28a	Aizy-Jouy outcrop (France)	Haustator Bed	Nummulites planulatus	Sables de Pierrefonds - Cuise Fm	Base NP12	81.1764	1.92495	1.99421	0.123234	0.133196	33.8527	1
198	29a	Aizy-Jouy outcrop (France)	Haustator Bed	Nummulites planulatus	Sables de Pierrefonds - Cuise Fm	Base NP12	81.0822	1.93715	1.49967	0.108026	0.100088	33.7893	1
199	30a	Aizy-Jouy outcrop (France)	Haustator Bed	Nummulites planulatus	Sables de Pierrefonds - Cuise Fm	Base NP12	83.5184	1.87575	1.8243	0.125251	0.133776	35.407	1
200	31a	Aizy-Jouy outcrop (France)	Haustator Bed	Nummulites planulatus	Sables de Pierrefonds - Cuise Fm	Base NP12	81.39	1.89386	0.86366	0.101518	0.0693436	33.9964	1
201	32a	Aizy-Jouy outcrop (France)	Haustator Bed	Nummulites planulatus	Sables de Pierrefonds - Cuise Fm	Base NP12	82.0621	1.94639	1.42168	0.120375	0.0844463	34.4457	1
202	33a	Aizy-Jouy outcrop (France)	Haustator Bed	Nummulites planulatus	Sables de Pierrefonds - Cuise Fm	Base NP12	83.766	1.88016	1.46128	0.151536	0.101809	35.5687	1
203	34a	Aizy-Jouy outcrop (France)	Haustator Bed	Nummulites planulatus	Sables de Pierrefonds - Cuise Fm	Base NP12	84.5091	1.8692	1.17669	0.125642	0.099462	36.0514	1
204	35a	Aizy-Jouy outcrop (France)	Haustator Bed	Nummulites planulatus	Sables de Pierrefonds - Cuise Fm	Base NP12	84.9869	1.96423	1.87423	0.119284	0.16182	36.3595	1
205	36a	Aizy-Jouy outcrop (France)	Haustator Bed	Nummulites planulatus	Sables de Pierrefonds - Cuise Fm	Base NP12	80.9734	1.9292	0.818009	0.139344	0.0873796	33.7159	1
206	37a	Aizy-Jouy outcrop (France)	Haustator Bed	Nummulites planulatus	Sables de Pierrefonds - Cuise Fm	Base NP12	85.3424	1.84688	1.33518	0.123888	0.247285	36.5875	1
207	38a	Aizy-Jouy outcrop (France)	Haustator Bed	Nummulites planulatus	Sables de Pierrefonds - Cuise Fm	Base NP12	84.3878	1.96157	1.18242	0.0953837	0.15638	35.9729	1
208	39a	Aizy-Jouy outcrop (France)	Haustator Bed	Nummulites planulatus	Sables de Pierrefonds - Cuise Fm	Base NP12	83.5033	1.97381	1.03544	0.129312	0.101975	35.3971	1
209	40a	Aizy-Jouy outcrop (France)	Haustator Bed	Nummulites planulatus	Sables de Pierrefonds - Cuise Fm	Base NP12	80.2016	1.94469	0.752773	0.114918	0.0970511	33.1926	1
210	46a	Aizy-Jouy outcrop (France)	Haustator Bed	Nummulites planulatus	Sables de Pierrefonds - Cuise Fm	Base NP12	87.3844	1.88962	0.715887	0.116328	0.0725283	37.8796	1
211	47a	Aizy-Jouy outcrop (France)	Haustator Bed	Nummulites planulatus	Sables de Pierrefonds - Cuise Fm	Base NP12	81.3921	1.90391	1.61404	0.112196	0.102994	33.9978	1
212	48a	Aizy-Jouy outcrop (France)	Haustator Bed	Nummulites planulatus	Sables de Pierrefonds - Cuise Fm	Base NP12	85.293	1.89142	1.44792	0.12703	0.111415	36.5559	1
213	49a	Aizy-Jouy outcrop (France)	Haustator Bed	Nummulites planulatus	Sables de Pierrefonds - Cuise Fm	Base NP12	85.9979	1.95528	0.646229	0.099305	0.0855845	37.0057	1
214	50a	Aizy-Jouy outcrop (France)	Haustator Bed	Nummulites planulatus	Sables de Pierrefonds - Cuise Fm	Base NP12	82.2267	1.96551	1.99533	0.14169	0.180072	34.5552	1
215	51a	Aizy-Jouy outcrop (France)	Haustator Bed	Nummulites planulatus	Sables de Pierrefonds - Cuise Fm	Base NP12	85.0503	1.90064	1.1049	0.107066	0.0735548	36.4002	1
216	52a	Aizy-Jouy outcrop (France)	Haustator Bed	Nummulites planulatus	Sables de Pierrefonds - Cuise Fm	Base NP12	87.5247	1.91105	0.911163	0.12067	0.0994995	37.9673	1
217	53a	Aizy-Jouy outcrop (France)	Haustator Bed	Nummulites planulatus	Sables de Pierrefonds - Cuise Fm	Base NP12	80.4597	1.91821	0.870257	0.150065	0.0589026	33.3682	1
218	54a	Aizy-Jouy outcrop (France)	Haustator Bed	Nummulites planulatus	Sables de Pierrefonds - Cuise Fm	Base NP12	81.2333	1.92051	0.792737	0.119437	0.0454595	33.891	1
219	55a	Aizy-Jouy outcrop (France)	Haustator Bed	Nummulites planulatus	Sables de Pierrefonds - Cuise Fm	Base NP12	82.8174	1.94379	0.815121	0.131203	0.0676563	34.9464	1
220	56a	Aizy-Jouy outcrop (France)	Haustator Bed	Nummulites planulatus	Sables de Pierrefonds - Cuise Fm	Base NP12	86.3668	1.90204	0.979775	0.140197	0.0686435	37.2396	1
221	57a	Aizy-Jouy outcrop (France)	Haustator Bed	Nummulites planulatus	Sables de Pierrefonds - Cuise Fm	Base NP12	82.3749	1.95332	0.810459	0.110226	0.049199	34.6536	1
222	58a	Aizy-Jouy outcrop (France)	Haustator Bed	Nummulites planulatus	Sables de Pierrefonds - Cuise Fm	Base NP12	80.144	1.92406	1.53913	0.130736	0.109453	33.1533	1
223	59a	Aizy-Jouy outcrop (France)	Haustator Bed	Nummulites planulatus	Sables de Pierrefonds - Cuise Fm	Base NP12	83.0036	1.91919	0.876464	0.135256	0.0684963	35.0691	1
224	60a	Aizy-Jouy outcrop (France)	Haustator Bed	Nummulites planulatus	Sables de Pierrefonds - Cuise Fm	Base NP12	83.3972	1.9132	0.684292	0.1167	0.0886414	35.3277	1
225	66a	Aizy-Jouy outcrop (France)	Haustator Bed	Nummulites planulatus	Sables de Pierrefonds - Cuise Fm	Base NP12	84.0414	1.9678	0.746103	0.0865985	0.0966701	35.7481	1
226	67a	Aizy-Jouy outcrop (France)	Haustator Bed	Nummulites planulatus	Sables de Pierrefonds - Cuise Fm	Base NP12	79.4256	1.92613	1.49436	0.105749	0.0932363	32.6613	1
227	68a	Aizy-Jouy outcrop (France)	Haustator Bed	Nummulites planulatus	Sables de Pierrefonds - Cuise Fm	Base NP12	82.8366	1.89151	0.885591	0.133632	0.0507333	34.9591	1
228	69a	Aizy-Jouy outcrop (France)	Haustator Bed	Nummulites planulatus	Sables de Pierrefonds - Cuise Fm	Base NP12	84.1162	1.92834	1.14429	0.116194	0.148646	35.7967	1
229	70a	Aizy-Jouy outcrop (France)	Haustator Bed	Nummulites planulatus	Sables de Pierrefonds - Cuise Fm	Base NP12	85.2447	1.90219	0.802069	0.0900682	0.0724927	36.525	1
230	71a	Aizy-Jouy outcrop (France)	Haustator Bed	Nummulites planulatus	Sables de Pierrefonds - Cuise Fm	Base NP12	80.5319	1.90136	0.878209	0.113418	0.0514755	33.4171	1
231	72a	Aizy-Jouy outcrop (France)	Haustator Bed	Nummulites planulatus	Sables de Pierrefonds - Cuise Fm	Base NP12	82.8566	1.91592	0.594773	0.102768	0.0529125	34.9723	1
232	73a	Aizy-Jouy outcrop (France)	Haustator Bed	Nummulites planulatus	Sables de Pierrefonds - Cuise Fm	Base NP12	82.3729	1.93744	1.57534	0.11592	0.127471	34.6523	1
233	74a	Aizy-Jouy outcrop (France)	Haustator Bed	Nummulites planulatus	Sables de Pierrefonds - Cuise Fm	Base NP12	83.1972	1.90937	0.757548	0.102591	0.0661601	35.1964	1
234	75a	Aizy-Jouy outcrop (France)	Haustator Bed	Nummulites planulatus	Sables de Pierrefonds - Cuise Fm	Base NP12	82.1083	1.90932	0.605536	0.113551	0.0491703	34.4765	1
235	76a	Aizy-Jouy outcrop (France)	Haustator Bed	Nummulites planulatus	Sables de Pierrefonds - Cuise Fm	Base NP12	82.7312	1.92388	0.733401	0.0896411	0.0583152	34.8895	1
236	77a	Aizy-Jouy outcrop (France)	Haustator Bed	Nummulites planulatus	Sables de Pierrefonds - Cuise Fm	Base NP12	85.938	1.9144	1.71649	0.145032	0.190306	36.9676	1
237	78a	Aizy-Jouy outcrop (France)	Haustator Bed	Nummulites planulatus	Sables de Pierrefonds - Cuise Fm	Base NP12	83.0722	1.88304	0.971805	0.12723	0.0773128	35.1143	1
238	N-6	Kester core (Belgium)	33.74 m	Nummulites involutus	Mons-en-Pévèle Fm	Base NP12*	63.2357	1.983	1.45729	0.816924	DL	20.2049	1
239	N-97	Kester core (Belgium)	33.74 m	Nummulites involutus	Mons-en-Pévèle Fm	Base NP12*	59.706	2.31418	1.42246	0.692006	DL	17.0663	1
240	N-41	Kester core (Belgium)	33.93 m	Nummulites involutus	Mons-en-Pévèle Fm	Base NP12*	62.0028	1.84895	1.29084	0.629168	DL	19.129	1
241	N-29	Kester core (Belgium)	42.95 m	Nummulites involutus	Mons-en-Pévèle Fm	Top NP11	69.2807	1.93327	1.81255	0.571677	0.615425	25.1938	1
242	N-113	Kester core (Belgium)	42.95 m	Nummulites involutus	Mons-en-Pévèle Fm	Top NP11	73.2801	1.93534	1.04393	0.59609	0.0626924	28.2606	1
243	N-114	Kester core (Belgium)	42.95 m	Nummulites involutus	Mons-en-Pévèle Fm	Top NP11	76.134	1.95855	1.43199	0.637371	0.237508	30.3484	1
244	N-19	Kester core (Belgium)	44.52 m	Nummulites involutus	Mons-en-Pévèle Fm	Top NP11	28.2744	0.699685	15.7624	6.4555	0.408068	-23.7794	1
245	N-9	Kester core (Belgium)	44.90-45.00 m	Nummulites involutus	Mons-en-Pévèle Fm	Top NP11	55.0987	1.49013	5.33235	3.31931	DL	12.6779	1
246	N-70	Kester core (Belgium)	44.90-45.00 m	Nummulites involutus	Mons-en-Pévèle Fm	Top NP11	65.9428	1.68171	4.35404	2.49144	0.167636	22.4955	1
247	N-12	Kester core (Belgium)	46.60-46.70 m	Nummulites involutus	Mons-en-Pévèle Fm	Top NP11	53.1751	1.5306	4.23615	1.13468	0.877549	10.7361	1
248	N-112	Kester core (Belgium)	46.60-46.70 m	Nummulites involutus	Mons-en-Pévèle Fm	Top NP11	65.0751	1.90019	4.71647	0.976235	0.463442	21.7717	1
249	N-17	Kester core (Belgium)	46.81-46.82 m	Nummulites involutus	Mons-en-Pévèle Fm	Top NP11	65.2893	1.93288	1.31491	0.728097	0.235888	21.9513	1
250	N-100	Kester core (Belgium)	46.81-46.82 m	Nummulites involutus	Mons-en-Pévèle Fm	Top NP11	66.6109	2.14635	1.84062	0.673893	0.60429	23.0464	1
251	N-123	Kester core (Belgium)	46.81-46.82 m	Nummulites involutus	Mons-en-Pévèle Fm	Top NP11	67.9145	1.97403	4.07614	0.858212	0.452961	24.1055	1
252	N-124	Kester core (Belgium)	46.81-46.82 m	Nummulites involutus	Mons-en-Pévèle Fm	Top NP11	66.6381	1.86727	4.23794	1.05048	0.469412	23.0687	1
253	N-28	Kester core (Belgium)	46.92 m	Nummulites involutus	Mons-en-Pévèle Fm	Top NP11	60.5907	1.87897	1.37117	1.04839	DL	17.8701	1
254	N-121	Kester core (Belgium)	46.92 m	Nummulites involutus	Mons-en-Pévèle Fm	Top NP11	66.585	2.01909	2.76038	0.940406	0.307112	23.0251	1
255	N-122	Kester core (Belgium)	46.92 m	Nummulites involutus	Mons-en-Pévèle Fm	Top NP11	66.903	1.96163	2.44781	1.15198	0.165385	23.2855	1
256	N-30	Kester core (Belgium)	51.45-51.50 m	Nummulites involutus	Mons-en-Pévèle Fm	Top NP11	63.0332	1.81331	3.01342	3.06448	DL	20.0297	1
257	N-119	Kester core (Belgium)	51.45-51.50 m	Nummulites involutus	Mons-en-Pévèle Fm	Top NP11	57.3969	1.81432	2.2646	4.85762	DL	14.911	1
258	N-120	Kester core (Belgium)	51.45-51.50 m	Nummulites involutus	Mons-en-Pévèle Fm	Top NP11	62.2264	1.81051	2.28301	4.02394	0.140511	19.3257	1
259	N-53	Kester core (Belgium)	56.84 m	Nummulites involutus	Mons-en-Pévèle Fm	Top NP11	57.7564	1.77902	3.61427	6.7617	DL	15.2522	1
260	N-21	Kester core (Belgium)	57.15-57.20 m	Nummulites involutus	Mons-en-Pévèle Fm	Top NP11	59.798	1.8303	3.26582	4.91622	DL	17.1504	1
261	N-117	Kester core (Belgium)	57.15-57.20 m	Nummulites involutus	Mons-en-Pévèle Fm	Top NP11	60.0301	1.749	4.22996	3.07608	0.283013	17.3621	1
262	N-118	Kester core (Belgium)	57.15-57.20 m	Nummulites involutus	Mons-en-Pévèle Fm	Top NP11	60.2795	1.8048	4.47585	5.47698	0.361212	17.5887	1
263	N-26	Kester core (Belgium)	57.50 m	Nummulites involutus	Mons-en-Pévèle Fm	Top NP11	54.5672	1.51771	5.28102	5.58277	DL	12.1483	1
264	N-116	Kester core (Belgium)	57.50 m	Nummulites involutus	Mons-en-Pévèle Fm	Top NP11	62.5834	1.75282	4.04668	3.65005	0.430819	19.6383	1
265	N-115	Kester core (Belgium)	57.50 m	Nummulites involutus	Mons-en-Pévèle Fm	Top NP11	60.8852	1.73422	5.78064	6.45061	0.270154	18.1351	1
266	N151	Kester core (Belgium)	59.15 m	Nummulites involutus	Mons-en-Pévèle Fm	Top NP11	63.7735	1.53614	5.34854	2.32528	DL	20.6677	1
267	N152	Kester core (Belgium)	59.15 m	Nummulites involutus	Mons-en-Pévèle Fm	Top NP11	29.7174	0.782825	1.73996	4.85477	DL	-21.0593	1
268	N-60	Kester core (Belgium)	60.8 m	Nummulites involutus	Mons-en-Pévèle Fm	Top NP11	58.5624	1.87922	4.54065	2.70344	DL	16.0095	1
269	K1	Kester core (Belgium)	31.3 m	Nummulites involutus	Mons-en-Pévèle Fm	Base NP12*	11.5847	0.352001	5.819	1.77588	0.166013	-72.5373	8
270	K2	Kester core (Belgium)	31.82 m	Nummulites involutus	Mons-en-Pévèle Fm	Base NP12*	39.2894	1.40325	7.86574	4.70715	0.121883	-5.80131	7
271	K3	Kester core (Belgium)	33.74 m	Nummulites involutus	Mons-en-Pévèle Fm	Base NP12*	71.3384	1.91924	1.51324	0.567992	0.130257	26.7932	7
272	K4	Kester core (Belgium)	33.93 m	Nummulites involutus	Mons-en-Pévèle Fm	Base NP12*	65.7761	1.87685	2.22774	0.796368	0.164419	22.3572	7
273	K5	Kester core (Belgium)	42.5-42.57 m	Nummulites involutus	Mons-en-Pévèle Fm	Top NP11	74.3579	1.90547	2.10588	0.891134	0.198499	29.0585	7
274	K6 = C	Kester core (Belgium)	42.95-43.00 m	Nummulites involutus	Mons-en-Pévèle Fm	Top NP11	68.6912	1.84024	2.5709	1.15907	0.314861	24.7269	7
275	K7	Kester core (Belgium)	44.52-44.60 m	Nummulites involutus	Mons-en-Pévèle Fm	Top NP11	26.1421	1.09017	18.8763	6.0283	0.253526	-28.064	7
276	K8	Kester core (Belgium)	44.90-45.00 m	Nummulites involutus	Mons-en-Pévèle Fm	Top NP11	69.2368	1.80279	4.25952	2.85437	0.132355	25.1592	8 (-7)
277	K9	Kester core (Belgium)	45.50 m	Nummulites involutus	Mons-en-Pévèle Fm	Top NP11	68.8258	1.8575	1.88438	1.26385	0.274968	24.8338	7
278	K10	Kester core (Belgium)	45.90-46.00 m	Nummulites involutus	Mons-en-Pévèle Fm	Top NP11	69.5774	1.84602	2.54109	1.62102	0.279325	25.4273	7
279	K11	Kester core (Belgium)	46.30-46.40 m	Nummulites involutus	Mons-en-Pévèle Fm	Top NP11	67.3044	1.86013	2.09257	1.74275	0.265081	23.6124	7
280	K12	Kester core (Belgium)	46.50-46.60 m	Nummulites involutus	Mons-en-Pévèle Fm	Top NP11	69.2375	1.89593	68.4275	0.531325	0.905033	25.1597	7
281	K13	Kester core (Belgium)	46.60-46.70 m	Nummulites involutus	Mons-en-Pévèle Fm	Top NP11	66.6799	1.88104	2.14507	0.642424	0.256142	23.103	7
282	K14	Kester core (Belgium)	46.81-46.82 m	Nummulites involutus	Mons-en-Pévèle Fm	Top NP11	70.9554	1.92486	2.56544	0.883637	0.505688	26.499	7
283	K15 = B	Kester core (Belgium)	46.92-46.95 m	Nummulites involutus	Mons-en-Pévèle Fm	Top NP11	66.3327	1.88669	2.23432	0.89958	0.216288	22.8177	7
284	K16	Kester core (Belgium)	47.90-48.00 m	Nummulites involutus	Mons-en-Pévèle Fm	Top NP11	5.58325	1.03866	2.33108	3.91099	0.188464	-112.423	5
285	K17	Kester core (Belgium)	49.14 m	Nummulites involutus	Mons-en-Pévèle Fm	Top NP11	50.1903	1.6889	0.561591	0.889713	0.0224391	7.57935	1
286	K18	Kester core (Belgium)	49.63-49.70 m	Nummulites involutus	Mons-en-Pévèle Fm	Top NP11	51.7445	1.65959	2.17825	1.93174	0.179935	9.24588	6
287	K19	Kester core (Belgium)	49.85 m	Nummulites involutus	Mons-en-Pévèle Fm	Top NP11	49.7151	1.63065	1.16676	1.48808	0.153389	7.05956	7
288	K20	Kester core (Belgium)	50.15 m	Nummulites involutus	Mons-en-Pévèle Fm	Top NP11	62.7987	1.84714	1.03833	1.3021	0.0828185	19.826	4
289	K21	Kester core (Belgium)	50.17 m	Nummulites involutus	Mons-en-Pévèle Fm	Top NP11	49.7142	1.63518	1.15311	1.46024	0.0526313	7.0585	5
290	K22	Kester core (Belgium)	50.78 m	Nummulites involutus	Mons-en-Pévèle Fm	Top NP11	63.3732	1.84819	3.09993	1.51879	0.244373	20.3236	7
291	K24	Kester core (Belgium)	51.45-51.50 m	Nummulites involutus	Mons-en-Pévèle Fm	Top NP11	59.0075	1.77395	2.61203	2.9168	0.311346	16.4233	7
292	K26	Kester core (Belgium)	55.9-60.00 m	Nummulites involutus	Mons-en-Pévèle Fm	Top NP11	68.7747	1.90851	2.37536	1.74629	0.248303	24.7933	7
293	K27	Kester core (Belgium)	56.84 m	Nummulites involutus	Mons-en-Pévèle Fm	Top NP11	66.615	1.85856	3.78851	3.93228	0.162967	23.0498	7
294	K28	Kester core (Belgium)	57.15-57.20 m	Nummulites involutus	Mons-en-Pévèle Fm	Top NP11	64.4603	1.82981	4.21041	3.74415	0.271004	21.253	7
295	K29	Kester core (Belgium)	57.53 m	Nummulites involutus	Mons-en-Pévèle Fm	Top NP11	56.6583	1.7279	6.01247	5.38401	0.272381	14.2032	7
296	K30	Kester core (Belgium)	58.50-58.60 m	Nummulites involutus	Mons-en-Pévèle Fm	Top NP11	64.5963	1.85517	4.16346	1.87243	0.713384	21.3682	7
297	K31	Kester core (Belgium)	59.9-60.00 m	Nummulites involutus	Mons-en-Pévèle Fm	Top NP11	69.0042	1.87736	8.47244	3.52031	0.629703	24.9753	7
298	K32	Kester core (Belgium)	60.80-60.90 m	Nummulites involutus	Mons-en-Pévèle Fm	Top NP11	68.5615	1.87992	7.23161	3.12654	0.483392	24.6236	7
299	K33	Kester core (Belgium)	61.90 m	Nummulites involutus	Mons-en-Pévèle Fm	Top NP11	10.413	0.994533	58.4311	6.09928	0.177836	-78.3644	3
300	B1	Kester core (Belgium)	46.92-46.95 m	Nummulites involutus	Mons-en-Pévèle Fm	Top NP11	69.8425	1.82917	1.65826	1.07829	0.3041	25.6352	1
301	B2	Kester core (Belgium)	46.92-46.95 m	Nummulites involutus	Mons-en-Pévèle Fm	Top NP11	64.4829	1.9103	1.85546	0.905691	0.462835	21.2722	1
302	B3	Kester core (Belgium)	46.92-46.95 m	Nummulites involutus	Mons-en-Pévèle Fm	Top NP11	66.9979	1.9207	1.28908	0.816973	2.63916	23.3629	1
303	B4	Kester core (Belgium)	46.92-46.95 m	Nummulites involutus	Mons-en-Pévèle Fm	Top NP11	65.1395	1.83528	2.78805	1.36046	1.76982	21.8258	1
304	B5	Kester core (Belgium)	46.92-46.95 m	Nummulites involutus	Mons-en-Pévèle Fm	Top NP11	63.5974	1.90332	3.94089	1.32972	0.971896	20.5166	1
305	B6	Kester core (Belgium)	46.92-46.95 m	Nummulites involutus	Mons-en-Pévèle Fm	Top NP11	65.2323	1.81653	1.40135	1.09967	0.386864	21.9036	1
306	B7	Kester core (Belgium)	46.92-46.95 m	Nummulites involutus	Mons-en-Pévèle Fm	Top NP11	61.8491	1.76859	1.81199	1.10968	0.348085	18.9933	1
307	B8	Kester core (Belgium)	46.92-46.95 m	Nummulites involutus	Mons-en-Pévèle Fm	Top NP11	61.1437	1.85501	1.54796	0.813969	0.673025	18.3666	1
308	B9	Kester core (Belgium)	46.92-46.95 m	Nummulites involutus	Mons-en-Pévèle Fm	Top NP11	58.3887	1.781	2.85216	2.32134	0.525733	15.8471	1
309	B10	Kester core (Belgium)	46.92-46.95 m	Nummulites involutus	Mons-en-Pévèle Fm	Top NP11	60.9026	1.83101	2.06263	1.31866	0.521537	18.1506	1
310	B11	Kester core (Belgium)	46.92-46.95 m	Nummulites involutus	Mons-en-Pévèle Fm	Top NP11	66.9745	1.91468	1.07415	0.708428	0.586673	23.3438	1
311	B12	Kester core (Belgium)	46.92-46.95 m	Nummulites involutus	Mons-en-Pévèle Fm	Top NP11	68.6343	1.93906	2.1373	0.969035	0.983259	24.6816	1
312	B13	Kester core (Belgium)	46.92-46.95 m	Nummulites involutus	Mons-en-Pévèle Fm	Top NP11	64.6523	1.88627	2.49431	0.846809	1.41439	21.4155	1
313	B14	Kester core (Belgium)	46.92-46.95 m	Nummulites involutus	Mons-en-Pévèle Fm	Top NP11	62.1415	1.9163	1.88832	0.970826	0.653734	19.2511	1
314	B15	Kester core (Belgium)	46.92-46.95 m	Nummulites involutus	Mons-en-Pévèle Fm	Top NP11	62.6122	1.85878	1.95365	0.814701	0.569384	19.6634	1
315	B16	Kester core (Belgium)	46.92-46.95 m	Nummulites involutus	Mons-en-Pévèle Fm	Top NP11	63.6487	1.92092	1.78209	0.665814	0.633222	20.5606	1
316	B17	Kester core (Belgium)	46.92-46.95 m	Nummulites involutus	Mons-en-Pévèle Fm	Top NP11	68.7034	1.83527	1.57387	0.999271	0.316952	24.7365	1
317	B18	Kester core (Belgium)	46.92-46.95 m	Nummulites involutus	Mons-en-Pévèle Fm	Top NP11	61.8989	1.91894	1.5875	0.751945	0.579658	19.0373	1
318	B19	Kester core (Belgium)	46.92-46.95 m	Nummulites involutus	Mons-en-Pévèle Fm	Top NP11	62.1341	1.84717	2.59452	1.2664	0.427386	19.2446	1
319	B20	Kester core (Belgium)	46.92-46.95 m	Nummulites involutus	Mons-en-Pévèle Fm	Top NP11	59.7118	1.78666	1.78451	1.39783	0.368716	17.0716	1
320	B21	Kester core (Belgium)	46.92-46.95 m	Nummulites involutus	Mons-en-Pévèle Fm	Top NP11	64.7188	1.83069	1.66593	0.756733	0.378569	21.4717	1
321	B22	Kester core (Belgium)	46.92-46.95 m	Nummulites involutus	Mons-en-Pévèle Fm	Top NP11	65.2844	1.91816	1.79959	1.01481	1.11211	21.9472	1
322	B23	Kester core (Belgium)	46.92-46.95 m	Nummulites involutus	Mons-en-Pévèle Fm	Top NP11	57.3667	1.46786	6.53483	3.01905	0.447812	14.8823	1
323	C1	Kester core (Belgium)	42.95-43.00 m	Nummulites involutus	Mons-en-Pévèle Fm	Top NP11	69.8078	1.75473	2.40579	1.24412	0.373399	25.608	1
324	C2	Kester core (Belgium)	42.95-43.00 m	Nummulites involutus	Mons-en-Pévèle Fm	Top NP11	73.2303	1.81037	1.57255	0.681604	0.356097	28.2235	1
325	C3	Kester core (Belgium)	42.95-43.00 m	Nummulites involutus	Mons-en-Pévèle Fm	Top NP11	75.2249	1.80712	1.68483	0.794784	0.399678	29.692	1
326	C4	Kester core (Belgium)	42.95-43.00 m	Nummulites involutus	Mons-en-Pévèle Fm	Top NP11	77.5154	1.83032	1.55993	0.844782	0.321171	31.331	1
327	C5	Kester core (Belgium)	42.95-43.00 m	Nummulites involutus	Mons-en-Pévèle Fm	Top NP11	70.4285	1.70651	3.01765	1.64953	0.40109	26.0918	1
328	C6	Kester core (Belgium)	42.95-43.00 m	Nummulites involutus	Mons-en-Pévèle Fm	Top NP11	71.7842	1.75549	2.32431	1.04335	0.295446	27.1336	1
329	C7	Kester core (Belgium)	42.95-43.00 m	Nummulites involutus	Mons-en-Pévèle Fm	Top NP11	74.1831	1.75646	1.9904	0.77147	0.473959	28.9299	1
330	C8	Kester core (Belgium)	42.95-43.00 m	Nummulites involutus	Mons-en-Pévèle Fm	Top NP11	75.8339	1.85261	1.57109	0.597346	1.0439	30.1326	1
331	C9	Kester core (Belgium)	42.95-43.00 m	Nummulites involutus	Mons-en-Pévèle Fm	Top NP11	50.4217	1.36073	8.3818	3.10365	0.373911	7.83073	1
332	C10	Kester core (Belgium)	42.95-43.00 m	Nummulites involutus	Mons-en-Pévèle Fm	Top NP11	50.4217	1.36073	8.3818	3.10365	0.373911	7.83073	1
333	C11	Kester core (Belgium)	42.95-43.00 m	Nummulites involutus	Mons-en-Pévèle Fm	Top NP11	70.3675	1.87479	-0.363155	-0.0562023	-0.0757296	26.0444	1
334	C12	Kester core (Belgium)	42.95-43.00 m	Nummulites involutus	Mons-en-Pévèle Fm	Top NP11	63.1895	1.75574	-0.496327	-0.0615099	-0.0538578	20.1649	1
335	C13	Kester core (Belgium)	42.95-43.00 m	Nummulites involutus	Mons-en-Pévèle Fm	Top NP11	67.7257	1.90842	-0.476518	-0.0783742	-0.0958677	23.9534	1
336	C14	Kester core (Belgium)	42.95-43.00 m	Nummulites involutus	Mons-en-Pévèle Fm	Top NP11	66.7851	1.74509	-0.563701	-0.0722467	-0.0643526	23.1891	1
337	C15	Kester core (Belgium)	42.95-43.00 m	Nummulites involutus	Mons-en-Pévèle Fm	Top NP11	59.5025	1.73779	-0.676891	-0.091591	-0.0945974	16.8798	1
338	C16	Kester core (Belgium)	42.95-43.00 m	Nummulites involutus	Mons-en-Pévèle Fm	Top NP11	67.5903	1.83181	-0.430352	-0.0567672	-0.0582412	23.844	1
339	C17	Kester core (Belgium)	42.95-43.00 m	Nummulites involutus	Mons-en-Pévèle Fm	Top NP11	70.2403	1.92194	-0.369703	-0.0575178	-0.0651098	25.9455	1
340	C18	Kester core (Belgium)	42.95-43.00 m	Nummulites involutus	Mons-en-Pévèle Fm	Top NP11	72.046	1.88436	-0.379894	-0.0545633	-0.0625483	27.3325	1
341	C19	Kester core (Belgium)	42.95-43.00 m	Nummulites involutus	Mons-en-Pévèle Fm	Top NP11	71.6248	1.96197	-0.353787	-0.0545023	-0.0736097	27.0122	1
342	C20	Kester core (Belgium)	42.95-43.00 m	Nummulites involutus	Mons-en-Pévèle Fm	Top NP11	70.0066	1.87506	-0.389282	-0.0603761	-0.0711792	25.7634	1
343	C21	Kester core (Belgium)	42.95-43.00 m	Nummulites involutus	Mons-en-Pévèle Fm	Top NP11	65.6174	1.9579	-0.386991	-0.059606	-0.0905381	22.2252	1
344	C22	Kester core (Belgium)	42.95-43.00 m	Nummulites involutus	Mons-en-Pévèle Fm	Top NP11	59.3399	1.72201	-0.696638	-0.0859095	-0.0597899	16.7302	1
345	C23	Kester core (Belgium)	42.95-43.00 m	Nummulites involutus	Mons-en-Pévèle Fm	Top NP11	56.9624	1.63862	-0.989738	-0.126014	-0.115808	14.4958	1
346	C24	Kester core (Belgium)	42.95-43.00 m	Nummulites involutus	Mons-en-Pévèle Fm	Top NP11	66.5048	1.92063	-0.460726	-0.0719337	-0.111518	22.9592	1
347	C25	Kester core (Belgium)	42.95-43.00 m	Nummulites involutus	Mons-en-Pévèle Fm	Top NP11	53.7367	1.4306	-1.38623	-0.174157	-0.168773	11.3102	1
348	C26	Kester core (Belgium)	42.95-43.00 m	Nummulites involutus	Mons-en-Pévèle Fm	Top NP11	55.3307	1.56584	-1.54158	-0.250876	-0.342602	12.9075	1
349	B24	Kester core (Belgium)	46.92-46.95 m	Nummulites involutus	Mons-en-Pévèle Fm	Top NP11	64.9213	1.95981	-0.324931	-0.0556601	-0.0691447	21.6424	1
350	B25	Kester core (Belgium)	46.92-46.95 m	Nummulites involutus	Mons-en-Pévèle Fm	Top NP11	66.6361	1.85347	-0.303612	-0.0531091	-0.0538495	23.067	1
351	B26	Kester core (Belgium)	46.92-46.95 m	Nummulites involutus	Mons-en-Pévèle Fm	Top NP11	63.381	1.87514	-0.373288	-0.0695147	-0.065015	20.3303	1
352	B27	Kester core (Belgium)	46.92-46.95 m	Nummulites involutus	Mons-en-Pévèle Fm	Top NP11	62.3045	1.85584	-0.498498	-0.0818432	-0.098849	19.3942	1
353	B28	Kester core (Belgium)	46.92-46.95 m	Nummulites involutus	Mons-en-Pévèle Fm	Top NP11	59.34	1.9268	-0.498766	-0.0713954	-0.0887827	16.7303	1
354	B29	Kester core (Belgium)	46.92-46.95 m	Nummulites involutus	Mons-en-Pévèle Fm	Top NP11	65.1657	1.82804	-0.362378	-0.0708163	-0.0486915	21.8477	1
355	B30	Kester core (Belgium)	46.92-46.95 m	Nummulites involutus	Mons-en-Pévèle Fm	Top NP11	59.0072	1.83538	-0.371716	-0.0660686	-0.0757891	16.4229	1
356	B31	Kester core (Belgium)	46.92-46.95 m	Nummulites involutus	Mons-en-Pévèle Fm	Top NP11	65.9873	1.96221	-0.321514	-0.0617324	-0.0610859	22.5324	1
357	B32	Kester core (Belgium)	46.92-46.95 m	Nummulites involutus	Mons-en-Pévèle Fm	Top NP11	64.8142	1.92996	-0.330714	-0.0574729	-0.0621086	21.5522	1
358	B33	Kester core (Belgium)	46.92-46.95 m	Nummulites involutus	Mons-en-Pévèle Fm	Top NP11	65.3495	1.88634	-0.285883	-0.0495028	-0.0598633	22.0017	1
359	91a	Kester core (Belgium)	46.92-46.95 m	Nummulites involutus	Mons-en-Pévèle Fm	Top NP11	65.9334	1.85697	2.42673	1.4294	0.196262	22.4877	1
360	92a	Kester core (Belgium)	46.92-46.95 m	Nummulites involutus	Mons-en-Pévèle Fm	Top NP11	68.0914	1.7276	1.79905	0.938196	0.143591	24.2476	1
361	93a	Kester core (Belgium)	46.92-46.95 m	Nummulites involutus	Mons-en-Pévèle Fm	Top NP11	67.3542	1.84809	1.91309	1.08611	0.238642	23.6528	1
362	94a	Kester core (Belgium)	46.92-46.95 m	Nummulites involutus	Mons-en-Pévèle Fm	Top NP11	67.8331	1.84457	1.46175	0.685533	0.150943	24.04	1
363	95a	Kester core (Belgium)	46.92-46.95 m	Nummulites involutus	Mons-en-Pévèle Fm	Top NP11	67.0082	1.78788	2.28853	1.59514	0.133269	23.3714	1
364	96a	Kester core (Belgium)	46.92-46.95 m	Nummulites involutus	Mons-en-Pévèle Fm	Top NP11	66.8147	1.82087	2.57431	1.34689	0.168005	23.2133	1
365	N-8	Mons Panisel core (Belgium)	31.30 m	Nummulites involutus	Mons-en-Pévèle Fm	NP11	41.6875	1.14805	7.05052	0.903282	DL	-2.56376	1
366	N-7	Mons Panisel core (Belgium)	31.90 m	Nummulites involutus	Mons-en-Pévèle Fm	NP11	63.5288	1.73766	0.708157	0.219933	DL	20.4576	1
367	N-98	Mons Panisel core (Belgium)	31.90 m	Nummulites involutus	Mons-en-Pévèle Fm	NP11	71.0693	1.82766	0.858406	0.199445	0.19993	26.5867	1
368	N-16	Mons Panisel core (Belgium)	34.80 m	Nummulites involutus	Mons-en-Pévèle Fm	NP11	58.595	1.75002	3.951	0.470408	DL	16.0399	1
369	N-99	Mons Panisel core (Belgium)	34.90 m	Nummulites involutus	Mons-en-Pévèle Fm	NP11	63.8263	1.77892	4.18668	0.499807	DL	20.7129	1
370	N-105	Mons Panisel core (Belgium)	34.80-34.90 m	Nummulites involutus	Mons-en-Pévèle Fm	NP11	64.2717	2.00667	2.40441	0.28755	DL	21.0929	1
371	N-106	Mons Panisel core (Belgium)	34.80-34.90 m	Nummulites involutus	Mons-en-Pévèle Fm	NP11	61.9766	1.70078	4.12265	0.48274	0.103843	19.1059	1
372	N-23	Mons Panisel core (Belgium)	36.45 m	Nummulites involutus	Mons-en-Pévèle Fm	NP11	72.3752	2.04744	1.75965	0.0705596	DL	27.5817	1
373	N-109	Mons Panisel core (Belgium)	36.40- 36.50 m	Nummulites involutus	Mons-en-Pévèle Fm	NP11	70.9838	1.95826	1.87786	0.483367	0.23778	26.5209	1
374	N-33	Mons Panisel core (Belgium)	37.60 m	Nummulites involutus	Mons-en-Pévèle Fm	NP11	65.6733	1.98951	1.90773	0.228894	DL	22.2718	1
375	N-104	Mons Panisel core (Belgium)	37.60 m	Nummulites involutus	Mons-en-Pévèle Fm	NP11	65.7676	1.96492	3.0992	0.206526	0.115385	22.3502	1
376	N-50	Mons Panisel core (Belgium)	37.80 m	Nummulites involutus	Mons-en-Pévèle Fm	NP11	67.0563	1.95155	2.08965	0.268316	DL	23.4105	1
377	N-101	Mons Panisel core (Belgium)	37.80 m	Nummulites involutus	Mons-en-Pévèle Fm	NP11	68.2285	2.31656	3.62488	0.254096	DL	24.3575	1
378	N-20	Mons Panisel core (Belgium)	38.36 m	Nummulites involutus	Mons-en-Pévèle Fm	NP11	62.6371	1.91381	2.86438	0.264091	DL	19.6851	1
379	N-102	Mons Panisel core (Belgium)	38.36 m	Nummulites involutus	Mons-en-Pévèle Fm	NP11	68.6361	2.05318	1.57005	0.220473	DL	24.683	1
380	N-103	Mons Panisel core (Belgium)	38.36 m	Nummulites involutus	Mons-en-Pévèle Fm	NP11	64.5928	2.00574	10.7651	0.39495	0.345262	21.3652	1
381	N-40	Mons Panisel core (Belgium)	40.57 m	Nummulites involutus	Mons-en-Pévèle Fm	NP11	61.5044	1.85724	1.33955	0.33711	DL	18.688	1
382	N-92	Mons Panisel core (Belgium)	40.57 m	Nummulites involutus	Mons-en-Pévèle Fm	NP11	61.217	2.12818	2.28597	0.438585	DL	18.432	1
383	N-111	Mons Panisel core (Belgium)	40.57 m	Nummulites involutus	Mons-en-Pévèle Fm	NP11	64.7821	2.11836	2.84682	0.355371	DL	21.5251	1
384	N-24	Mons Panisel core (Belgium)	40.7 m	Nummulites involutus	Mons-en-Pévèle Fm	NP11	62.0721	1.99048	1.88891	0.197868	DL	19.1901	1
385	N-108	Mons Panisel core (Belgium)	40.70-40.80 m	Nummulites involutus	Mons-en-Pévèle Fm	NP11	62.282	2.23011	1.63217	0.160417	DL	19.3745	1
386	N-56	Mons Panisel core (Belgium)	41.70 m	Nummulites involutus	Mons-en-Pévèle Fm	NP11	58.4516	1.83207	1.56829	1.29468	DL	15.906	1
387	N-94	Mons Panisel core (Belgium)	41.70 m	Nummulites involutus	Mons-en-Pévèle Fm	NP11	63.1008	2.06837	1.65695	0.577353	DL	20.0882	1
388	N153	Mons Panisel core (Belgium)	48.97 m	Nummulites involutus	Mons-en-Pévèle Fm	NP11	62.8972	1.49863	2.88607	0.264368	DL	19.9116	1
389	N154	Mons Panisel core (Belgium)	49.55 m	Nummulites involutus	Mons-en-Pévèle Fm	NP11	58.0498	1.64742	4.09389	1.42669	DL	15.529	1
390	N155	Mons Panisel core (Belgium)	49.55 m	Nummulites involutus	Mons-en-Pévèle Fm	NP11	60.3657	1.67824	2.09401	1.27456	DL	17.6668	1
391	N156	Mons Panisel core (Belgium)	50.80 m	Nummulites involutus	Mons-en-Pévèle Fm	NP11	68.1853	1.90725	1.37066	0.121628	0.287522	24.323	1
392	N157	Mons Panisel core (Belgium)	50.80 m	Nummulites involutus	Mons-en-Pévèle Fm	NP11	73.4488	1.93947	1.77925	0.202039	DL	28.3863	1
393	N158	Mons Panisel core (Belgium)	50.80 m	Nummulites involutus	Mons-en-Pévèle Fm	NP11	70.6037	1.93898	2.50752	0.166302	0.74113	26.2275	1
394	N159	Mons Panisel core (Belgium)	50.80 m	Nummulites involutus	Mons-en-Pévèle Fm	NP11	70.815	1.92337	1.40288	0.243097	DL	26.3908	1
395	N160	Mons Panisel core (Belgium)	50.80 m	Nummulites involutus	Mons-en-Pévèle Fm	NP11	66.996	1.89879	1.20847	0.213452	DL	23.3614	1
396	N-5	Mons Panisel core (Belgium)	50.70 m	Nummulites involutus	Mons-en-Pévèle Fm	NP11	66.3726	1.89107	1.74112	0.212793	DL	22.8505	1
397	N-110	Mons Panisel core (Belgium)	50.70-50.80 m	Nummulites involutus	Mons-en-Pévèle Fm	NP11	72.369	2.12628	2.64594	0.298099	0.128118	27.577	1
398	N-35	Mons Panisel core (Belgium)	51.10 m	Nummulites involutus	Mons-en-Pévèle Fm	NP11	68.5615	1.98034	1.40076	0.144202	DL	24.6236	1
399	N-93	Mons Panisel core (Belgium)	51.10 m	Nummulites involutus	Mons-en-Pévèle Fm	NP11	67.3729	2.2949	1.26857	0.124353	DL	23.668	1
400	N-85	Mons Panisel core (Belgium)	51.10 m	Nummulites involutus	Mons-en-Pévèle Fm	NP11	70.062	2.0403	2.36063	0.246809	0.261303	25.8066	1
401	N-25	Mons Panisel core (Belgium)	51.99 m	Nummulites involutus	Mons-en-Pévèle Fm	NP11	65.4698	1.93738	6.35739	0.186066	DL	22.1022	1
402	N-107	Mons Panisel core (Belgium)	51.99 m	Nummulites involutus	Mons-en-Pévèle Fm	NP11	69.2464	2.00921	2.75224	0.296772	DL	25.1668	1
403	N141	Various Outcrops - Mont Saint Aubert (Belgium)	43.08 m	Nummulites involutus	Mons-en-Pévèle Fm	-	66.1069	1.91203	8.58469	1.36645	0.258851	22.6313	1
404	N142	Various Outcrops - Mont Saint Aubert (Belgium)	43.08 m	Nummulites involutus	Mons-en-Pévèle Fm	-	67.6467	1.81911	12.7318	1.12583	0.654148	23.8896	1
405	N143	Various Outcrops - Mont Saint Aubert (Belgium)	43.08 m	Nummulites involutus	Mons-en-Pévèle Fm	-	64.1044	1.77257	5.08662	1.09586	DL	20.9505	1
406	N144	Various Outcrops - Mont Saint Aubert (Belgium)	43.08 m	Nummulites involutus	Mons-en-Pévèle Fm	-	63.6754	1.8454	3.74126	0.956758	DL	20.5835	1
407	N145	Various Outcrops - Mont Saint Aubert (Belgium)	43.08 m	Nummulites involutus	Mons-en-Pévèle Fm	-	67.3762	1.68171	3.03433	1.08981	DL	23.6707	1
408	N146	Various Outcrops - Mont Saint Aubert (Belgium)	44.85 m	Nummulites involutus	Mons-en-Pévèle Fm	-	71.9256	1.95114	2.55831	0.523937	0.171472	27.2411	1
409	N147	Various Outcrops - Mont Saint Aubert (Belgium)	44.85 m	Nummulites involutus	Mons-en-Pévèle Fm	-	67.0213	1.9141	3.93655	0.816071	DL	23.382	1
410	N148	Various Outcrops - Mont Saint Aubert (Belgium)	44.85 m	Nummulites involutus	Mons-en-Pévèle Fm	-	69.8027	1.86819	3.86828	0.678928	0.497106	25.604	1
411	N149	Various Outcrops - Mont Saint Aubert (Belgium)	44.85 m	Nummulites involutus	Mons-en-Pévèle Fm	-	65.3545	1.93815	1.67896	0.717154	DL	22.0058	1
412	N150	Various Outcrops - Mont Saint Aubert (Belgium)	44.85 m	Nummulites involutus	Mons-en-Pévèle Fm	-	71.8042	1.69608	1.85424	0.568278	DL	27.1488	1
413	N-22	Various Outcrops (Belgium)	Hyon MMV 1201 - pevele 10	Nummulites involutus	Mons-en-Pévèle Fm	-	64.3478	1.86351	2.01383	0.485884	DL	21.1576	1
414	N-13	Various Outcrops (Belgium)	Franes-lez-Buissenal XC1226 - pevele 18	Nummulites involutus	Mons-en-Pévèle Fm	-	47.7025	1.3561	6.58336	2.01775	DL	4.80135	1
415	N-15	Various Outcrops (Belgium)	Mons-en-Pévèle CAG1252 - pevele 20	Nummulites involutus	Mons-en-Pévèle Fm	-	12.1228	0.337947	14.7044	3.0836	0.266739	-70.0566	1
416	N-18	Various Outcrops (Belgium)	Mons-en-Pévèle CAG1250 - pevele 22	Nummulites involutus	Mons-en-Pévèle Fm	-	10.691	0.328819	15.7282	2.87425	0.202765	-76.9246	1
417	N-1	Various Outcrops (Belgium)	Mont Saint Aubert DH1209 - pevele11	Nummulites involutus	Mons-en-Pévèle Fm	-	57.1346	1.57406	5.91994	1.6217	1.45392	14.6607	1
418	N-2	Various Outcrops (Belgium)	Mont-Saint-Aubert DH1210 - pevele26	Nummulites involutus	Mons-en-Pévèle Fm	-	40.4893	1.17648	9.55578	1.56136	0.187432	-4.15745	1
419	N-47	Various Outcrops (Belgium)	Mont-Saint-Aubert DH1211 - pevele 28	Nummulites involutus	Mons-en-Pévèle Fm	-	51.6405	1.56358	5.74974	2.07735	DL	9.13592	1
420	N-14	Various Outcrops (Belgium)	Mont-Saint-Aubert DH1212 - pevele 27	Nummulites involutus	Mons-en-Pévèle Fm	-	17.5938	0.451746	14.3179	1.84605	0.2628	-49.7033	1
421	N-31	Various Outcrops (Belgium)	Mont Saint Aubert DH1212 - pevele 12	Nummulites involutus	Mons-en-Pévèle Fm	-	38.149	1.20453	2.0507	2.42111	DL	-7.41097	1
422	N-11	Various Outcrops (Belgium)	Forest Nummulite faunule Chris King - coarse fraction	Nummulites involutus	Mons-en-Pévèle Fm	-	15.1697	0.436054	8.49555	2.55557	DL	-57.8042	1
423	N-66	Various Outcrops (Belgium)	Forest Nummulite faunule Chris King - coarse fraction	Nummulites involutus	Mons-en-Pévèle Fm	-	11.5535	0.328659	9.83522	2.41172	0.186179	-72.6848	1
424	N-67	Various Outcrops (Belgium)	Forest Nummulite faunule Chris King - coarse fraction	Nummulites involutus	Mons-en-Pévèle Fm	-	8.14761	0.254105	8.05893	2.40956	0.212494	-91.7702	1
425	N-79	Various Outcrops (Belgium)	Forest ditrupa level	Nummulites involutus	Mons-en-Pévèle Fm	-	64.8977	1.71674	2.10845	1.99022	DL	21.6226	1
426	N-43	Various Outcrops (Belgium)	Forest ditrupa level	Nummulites involutus	Mons-en-Pévèle Fm	-	59.8857	1.74661	1.93781	1.16536	DL	17.2305	1

## Sheet: Size-Data
Nr	ID	Location	sample level	Nummulites species	Member-Formation	NP-zone	Radius	Mg/Ca mmol/mol	Sr/Ca mmol/mol	Fe/Ca mmol/mol	Mn/Ca mmol/mol	Al/Ca mmol/mol
1	6a	Aizy-Jouy outcrop (France)	Haustator Bed	Nummulites planulatus	Sables de Pierrefonds - Cuise Fm	Base NP12	4.43	83.9668	1.86945	1.07413	0.118518	0.0949754
2	7a	Aizy-Jouy outcrop (France)	Haustator Bed	Nummulites planulatus	Sables de Pierrefonds - Cuise Fm	Base NP12	2.938	82.8483	1.91688	1.05254	0.123837	0.0596156
3	8a	Aizy-Jouy outcrop (France)	Haustator Bed	Nummulites planulatus	Sables de Pierrefonds - Cuise Fm	Base NP12	1.841	80.9719	1.91155	1.62526	0.102811	0.106746
4	9a	Aizy-Jouy outcrop (France)	Haustator Bed	Nummulites planulatus	Sables de Pierrefonds - Cuise Fm	Base NP12	4.147	82.3141	1.89179	0.791159	0.123812	0.0593516
5	10a	Aizy-Jouy outcrop (France)	Haustator Bed	Nummulites planulatus	Sables de Pierrefonds - Cuise Fm	Base NP12	1.068	83.4257	1.93964	1.28746	0.130679	0.47496
6	11a	Aizy-Jouy outcrop (France)	Haustator Bed	Nummulites planulatus	Sables de Pierrefonds - Cuise Fm	Base NP12	1.628	85.6605	1.92824	0.724732	0.0946324	0.0689573
7	12a	Aizy-Jouy outcrop (France)	Haustator Bed	Nummulites planulatus	Sables de Pierrefonds - Cuise Fm	Base NP12	1.941	84.2573	1.90218	1.08755	0.142841	0.0957755
8	13a	Aizy-Jouy outcrop (France)	Haustator Bed	Nummulites planulatus	Sables de Pierrefonds - Cuise Fm	Base NP12	1.955	83.3372	1.91143	1.32368	0.122129	0.0842443
9	14a	Aizy-Jouy outcrop (France)	Haustator Bed	Nummulites planulatus	Sables de Pierrefonds - Cuise Fm	Base NP12	2.148	83.4834	1.94246	1.57652	0.140426	0.103069
10	15a	Aizy-Jouy outcrop (France)	Haustator Bed	Nummulites planulatus	Sables de Pierrefonds - Cuise Fm	Base NP12	5.139	82.9846	1.92393	1.02797	0.131267	0.0741476
11	16a	Aizy-Jouy outcrop (France)	Haustator Bed	Nummulites planulatus	Sables de Pierrefonds - Cuise Fm	Base NP12	2.622	80.3445	1.94064	0.944475	0.115258	0.0721288
12	17a	Aizy-Jouy outcrop (France)	Haustator Bed	Nummulites planulatus	Sables de Pierrefonds - Cuise Fm	Base NP12	3.179	82.6973	1.91047	0.983777	0.108945	0.0580751
13	18a	Aizy-Jouy outcrop (France)	Haustator Bed	Nummulites planulatus	Sables de Pierrefonds - Cuise Fm	Base NP12	1.061	86.1915	1.9717	0.715494	0.124145	0.0761469
14	19a	Aizy-Jouy outcrop (France)	Haustator Bed	Nummulites planulatus	Sables de Pierrefonds - Cuise Fm	Base NP12	1.234	83.7267	1.98951	0.68633	0.127868	0.123303
15	20a	Aizy-Jouy outcrop (France)	Haustator Bed	Nummulites planulatus	Sables de Pierrefonds - Cuise Fm	Base NP12	2.528	83.8071	1.89249	1.76336	0.131552	0.0825094
16	26a	Aizy-Jouy outcrop (France)	Haustator Bed	Nummulites planulatus	Sables de Pierrefonds - Cuise Fm	Base NP12	1.475	78.2708	1.98043	0.881157	0.0998439	0.0688693
17	27a	Aizy-Jouy outcrop (France)	Haustator Bed	Nummulites planulatus	Sables de Pierrefonds - Cuise Fm	Base NP12	1.936	82.7217	1.94144	1.10695	0.117215	0.0622162
18	28a	Aizy-Jouy outcrop (France)	Haustator Bed	Nummulites planulatus	Sables de Pierrefonds - Cuise Fm	Base NP12	3.021	81.1764	1.92495	1.99421	0.123234	0.133196
19	29a	Aizy-Jouy outcrop (France)	Haustator Bed	Nummulites planulatus	Sables de Pierrefonds - Cuise Fm	Base NP12	1.774	81.0822	1.93715	1.49967	0.108026	0.100088
20	30a	Aizy-Jouy outcrop (France)	Haustator Bed	Nummulites planulatus	Sables de Pierrefonds - Cuise Fm	Base NP12	2.009	83.5184	1.87575	1.8243	0.125251	0.133776
21	31a	Aizy-Jouy outcrop (France)	Haustator Bed	Nummulites planulatus	Sables de Pierrefonds - Cuise Fm	Base NP12	2.518	81.39	1.89386	0.86366	0.101518	0.0693436
22	32a	Aizy-Jouy outcrop (France)	Haustator Bed	Nummulites planulatus	Sables de Pierrefonds - Cuise Fm	Base NP12	3.215	82.0621	1.94639	1.42168	0.120375	0.0844463
23	33a	Aizy-Jouy outcrop (France)	Haustator Bed	Nummulites planulatus	Sables de Pierrefonds - Cuise Fm	Base NP12	4.436	83.766	1.88016	1.46128	0.151536	0.101809
24	34a	Aizy-Jouy outcrop (France)	Haustator Bed	Nummulites planulatus	Sables de Pierrefonds - Cuise Fm	Base NP12	3.223	84.5091	1.8692	1.17669	0.125642	0.099462
25	35a	Aizy-Jouy outcrop (France)	Haustator Bed	Nummulites planulatus	Sables de Pierrefonds - Cuise Fm	Base NP12	1.332	84.9869	1.96423	1.87423	0.119284	0.16182
26	36a	Aizy-Jouy outcrop (France)	Haustator Bed	Nummulites planulatus	Sables de Pierrefonds - Cuise Fm	Base NP12	1.787	80.9734	1.9292	0.818009	0.139344	0.0873796
27	37a	Aizy-Jouy outcrop (France)	Haustator Bed	Nummulites planulatus	Sables de Pierrefonds - Cuise Fm	Base NP12	0.911	85.3424	1.84688	1.33518	0.123888	0.247285
28	38a	Aizy-Jouy outcrop (France)	Haustator Bed	Nummulites planulatus	Sables de Pierrefonds - Cuise Fm	Base NP12	0.819	84.3878	1.96157	1.18242	0.0953837	0.15638
29	39a	Aizy-Jouy outcrop (France)	Haustator Bed	Nummulites planulatus	Sables de Pierrefonds - Cuise Fm	Base NP12	3.866	83.5033	1.97381	1.03544	0.129312	0.101975
30	40a	Aizy-Jouy outcrop (France)	Haustator Bed	Nummulites planulatus	Sables de Pierrefonds - Cuise Fm	Base NP12	1.736	80.2016	1.94469	0.752773	0.114918	0.0970511
31	46a	Aizy-Jouy outcrop (France)	Haustator Bed	Nummulites planulatus	Sables de Pierrefonds - Cuise Fm	Base NP12	2.065	87.3844	1.88962	0.715887	0.116328	0.0725283
32	47a	Aizy-Jouy outcrop (France)	Haustator Bed	Nummulites planulatus	Sables de Pierrefonds - Cuise Fm	Base NP12	2.236	81.3921	1.90391	1.61404	0.112196	0.102994
33	48a	Aizy-Jouy outcrop (France)	Haustator Bed	Nummulites planulatus	Sables de Pierrefonds - Cuise Fm	Base NP12	2.882	85.293	1.89142	1.44792	0.12703	0.111415
34	49a	Aizy-Jouy outcrop (France)	Haustator Bed	Nummulites planulatus	Sables de Pierrefonds - Cuise Fm	Base NP12	1.078	85.9979	1.95528	0.646229	0.099305	0.0855845
35	50a	Aizy-Jouy outcrop (France)	Haustator Bed	Nummulites planulatus	Sables de Pierrefonds - Cuise Fm	Base NP12	1.994	82.2267	1.96551	1.99533	0.14169	0.180072
36	51a	Aizy-Jouy outcrop (France)	Haustator Bed	Nummulites planulatus	Sables de Pierrefonds - Cuise Fm	Base NP12	1.376	85.0503	1.90064	1.1049	0.107066	0.0735548
37	52a	Aizy-Jouy outcrop (France)	Haustator Bed	Nummulites planulatus	Sables de Pierrefonds - Cuise Fm	Base NP12	1.99	87.5247	1.91105	0.911163	0.12067	0.0994995
38	53a	Aizy-Jouy outcrop (France)	Haustator Bed	Nummulites planulatus	Sables de Pierrefonds - Cuise Fm	Base NP12	1.498	80.4597	1.91821	0.870257	0.150065	0.0589026
39	54a	Aizy-Jouy outcrop (France)	Haustator Bed	Nummulites planulatus	Sables de Pierrefonds - Cuise Fm	Base NP12	3.346	81.2333	1.92051	0.792737	0.119437	0.0454595
40	55a	Aizy-Jouy outcrop (France)	Haustator Bed	Nummulites planulatus	Sables de Pierrefonds - Cuise Fm	Base NP12	1.33	82.8174	1.94379	0.815121	0.131203	0.0676563
41	56a	Aizy-Jouy outcrop (France)	Haustator Bed	Nummulites planulatus	Sables de Pierrefonds - Cuise Fm	Base NP12	3.056	86.3668	1.90204	0.979775	0.140197	0.0686435
42	57a	Aizy-Jouy outcrop (France)	Haustator Bed	Nummulites planulatus	Sables de Pierrefonds - Cuise Fm	Base NP12	3.684	82.3749	1.95332	0.810459	0.110226	0.049199
43	58a	Aizy-Jouy outcrop (France)	Haustator Bed	Nummulites planulatus	Sables de Pierrefonds - Cuise Fm	Base NP12	3.973	80.144	1.92406	1.53913	0.130736	0.109453
44	59a	Aizy-Jouy outcrop (France)	Haustator Bed	Nummulites planulatus	Sables de Pierrefonds - Cuise Fm	Base NP12	3.894	83.0036	1.91919	0.876464	0.135256	0.0684963
45	60a	Aizy-Jouy outcrop (France)	Haustator Bed	Nummulites planulatus	Sables de Pierrefonds - Cuise Fm	Base NP12	3.795	83.3972	1.9132	0.684292	0.1167	0.0886414
46	66a	Aizy-Jouy outcrop (France)	Haustator Bed	Nummulites planulatus	Sables de Pierrefonds - Cuise Fm	Base NP12	0.882	84.0414	1.9678	0.746103	0.0865985	0.0966701
47	67a	Aizy-Jouy outcrop (France)	Haustator Bed	Nummulites planulatus	Sables de Pierrefonds - Cuise Fm	Base NP12	1.838	79.4256	1.92613	1.49436	0.105749	0.0932363
48	68a	Aizy-Jouy outcrop (France)	Haustator Bed	Nummulites planulatus	Sables de Pierrefonds - Cuise Fm	Base NP12	3.976	82.8366	1.89151	0.885591	0.133632	0.0507333
49	69a	Aizy-Jouy outcrop (France)	Haustator Bed	Nummulites planulatus	Sables de Pierrefonds - Cuise Fm	Base NP12	2.557	84.1162	1.92834	1.14429	0.116194	0.148646
50	70a	Aizy-Jouy outcrop (France)	Haustator Bed	Nummulites planulatus	Sables de Pierrefonds - Cuise Fm	Base NP12	1.471	85.2447	1.90219	0.802069	0.0900682	0.0724927
51	71a	Aizy-Jouy outcrop (France)	Haustator Bed	Nummulites planulatus	Sables de Pierrefonds - Cuise Fm	Base NP12	2.026	80.5319	1.90136	0.878209	0.113418	0.0514755
52	72a	Aizy-Jouy outcrop (France)	Haustator Bed	Nummulites planulatus	Sables de Pierrefonds - Cuise Fm	Base NP12	1.795	82.8566	1.91592	0.594773	0.102768	0.0529125
53	73a	Aizy-Jouy outcrop (France)	Haustator Bed	Nummulites planulatus	Sables de Pierrefonds - Cuise Fm	Base NP12	4.411	82.3729	1.93744	1.57534	0.11592	0.127471
54	74a	Aizy-Jouy outcrop (France)	Haustator Bed	Nummulites planulatus	Sables de Pierrefonds - Cuise Fm	Base NP12	1.25	83.1972	1.90937	0.757548	0.102591	0.0661601
55	75a	Aizy-Jouy outcrop (France)	Haustator Bed	Nummulites planulatus	Sables de Pierrefonds - Cuise Fm	Base NP12	1.822	82.1083	1.90932	0.605536	0.113551	0.0491703
56	76a	Aizy-Jouy outcrop (France)	Haustator Bed	Nummulites planulatus	Sables de Pierrefonds - Cuise Fm	Base NP12	3.943	82.7312	1.92388	0.733401	0.0896411	0.0583152
57	77a	Aizy-Jouy outcrop (France)	Haustator Bed	Nummulites planulatus	Sables de Pierrefonds - Cuise Fm	Base NP12	3.649	85.938	1.9144	1.71649	0.145032	0.190306
58	78a	Aizy-Jouy outcrop (France)	Haustator Bed	Nummulites planulatus	Sables de Pierrefonds - Cuise Fm	Base NP12	4.504	83.0722	1.88304	0.971805	0.12723	0.0773128
59	79a	Ampe Quarry (Belgium)	Falun II	Nummulites aquitanicus	Egem Mbr - Hyon Fm	Top NP12	3.876	78.1652	1.91254	5.05052	1.36834	0.0740332
60	80a	Ampe Quarry (Belgium)	Falun II	Nummulites aquitanicus	Egem Mbr - Hyon Fm	Top NP12	6.228	80.377	1.87546	2.46699	1.20755	0.0363584
61	86a	Ampe Quarry (Belgium)	Falun II	Nummulites aquitanicus	Egem Mbr - Hyon Fm	Top NP12	4.691	84.767	1.94135	5.88936	1.11158	0.106212
62	87a	Ampe Quarry (Belgium)	Falun II	Nummulites aquitanicus	Egem Mbr - Hyon Fm	Top NP12	4.017	80.1408	1.93012	6.8657	0.845441	0.0663357
63	88a	Ampe Quarry (Belgium)	Falun II	Nummulites aquitanicus	Egem Mbr - Hyon Fm	Top NP12	3.52	81.7922	1.77928	4.83604	2.13719	0.163363
64	89a	Ampe Quarry (Belgium)	Falun II	Nummulites aquitanicus	Egem Mbr - Hyon Fm	Top NP12	3.948	80.8798	1.95202	3.64954	1.23183	0.0608834
65	90a	Ampe Quarry (Belgium)	Falun II	Nummulites aquitanicus	Egem Mbr - Hyon Fm	Top NP12	4.522	79.8634	1.9082	4.93233	1.22408	0.0762971
66	A1	Ampe Quarry (Belgium)	Falun II	Nummulites aquitanicus	Egem Mbr - Hyon Fm	Top NP12	4.383	81.1192	1.83172	8.52831	2.03478	0.19021
67	A2	Ampe Quarry (Belgium)	Falun II	Nummulites aquitanicus	Egem Mbr - Hyon Fm	Top NP12	3.461	83.5628	1.77417	3.62438	1.65875	0.156972
68	A3	Ampe Quarry (Belgium)	Falun II	Nummulites aquitanicus	Egem Mbr - Hyon Fm	Top NP12	3.595	80.0611	1.81475	5.76209	2.38623	0.225591
69	A4	Ampe Quarry (Belgium)	Falun II	Nummulites aquitanicus	Egem Mbr - Hyon Fm	Top NP12	2.844	78.056	1.87877	14.5741	1.77585	0.217025
70	A5	Ampe Quarry (Belgium)	Falun II	Nummulites aquitanicus	Egem Mbr - Hyon Fm	Top NP12	2.912	82.5853	1.816	9.09999	1.1909	0.207033
71	A6	Ampe Quarry (Belgium)	Falun II	Nummulites aquitanicus	Egem Mbr - Hyon Fm	Top NP12	2.023	80.2452	1.92639	3.75686	1.01572	0.211455
72	A7	Ampe Quarry (Belgium)	Falun II	Nummulites aquitanicus	Egem Mbr - Hyon Fm	Top NP12	2.06	77.1251	1.9396	4.49978	1.49081	0.236429
73	A8	Ampe Quarry (Belgium)	Falun II	Nummulites aquitanicus	Egem Mbr - Hyon Fm	Top NP12	1.807	82.1274	1.85002	3.53282	1.73246	0.231813
74	A9	Ampe Quarry (Belgium)	Falun II	Nummulites aquitanicus	Egem Mbr - Hyon Fm	Top NP12	1.682	80.4048	1.97391	6.43735	1.0787	0.22422
75	A10	Ampe Quarry (Belgium)	Falun II	Nummulites aquitanicus	Egem Mbr - Hyon Fm	Top NP12	1.46	79.6505	1.9138	3.58024	1.28306	0.48876
76	A11	Ampe Quarry (Belgium)	Falun II	Nummulites aquitanicus	Egem Mbr - Hyon Fm	Top NP12	1.471	76.6931	1.95243	2.76456	0.985264	0.303905
77	A12	Ampe Quarry (Belgium)	Falun II	Nummulites aquitanicus	Egem Mbr - Hyon Fm	Top NP12	1.262	74.7096	1.90844	3.67934	1.55059	0.424663
78	A13	Ampe Quarry (Belgium)	Falun II	Nummulites aquitanicus	Egem Mbr - Hyon Fm	Top NP12	1.423	76.6641	1.8513	6.67573	2.21022	0.376319
79	A14	Ampe Quarry (Belgium)	Falun II	Nummulites aquitanicus	Egem Mbr - Hyon Fm	Top NP12	1.199	76.1754	1.94861	5.7331	1.74019	0.502872
80	A15	Ampe Quarry (Belgium)	Falun II	Nummulites aquitanicus	Egem Mbr - Hyon Fm	Top NP12	1.403	77.6709	1.98405	2.95193	1.37957	0.473793
81	A16	Ampe Quarry (Belgium)	Falun II	Nummulites aquitanicus	Egem Mbr - Hyon Fm	Top NP12	1.085	77.0889	2.03006	12.1766	1.86413	0.587799
82	A17	Ampe Quarry (Belgium)	Falun II	Nummulites aquitanicus	Egem Mbr - Hyon Fm	Top NP12	1.12	79.506	2.05426	3.88724	1.6843	0.502604
83	A18	Ampe Quarry (Belgium)	Falun II	Nummulites aquitanicus	Egem Mbr - Hyon Fm	Top NP12	0.951	78.1429	2.017	3.2458	1.01414	1.11651
84	A19	Ampe Quarry (Belgium)	Falun II	Nummulites aquitanicus	Egem Mbr - Hyon Fm	Top NP12	0.768	78.9196	1.98674	6.37827	1.30885	1.69712
85	A20	Ampe Quarry (Belgium)	Falun II	Nummulites aquitanicus	Egem Mbr - Hyon Fm	Top NP12	1.299	75.2582	1.96977	3.16123	1.32861	0.381129
86	A21	Ampe Quarry (Belgium)	Falun II	Nummulites aquitanicus	Egem Mbr - Hyon Fm	Top NP12	3.428	81.7489	1.94569	3.72699	1.22736	0.199575
87	A22	Ampe Quarry (Belgium)	Falun II	Nummulites aquitanicus	Egem Mbr - Hyon Fm	Top NP12	1.76	71.6531	1.9179	5.61704	1.60188	0.261751
88	A23	Ampe Quarry (Belgium)	Falun II	Nummulites aquitanicus	Egem Mbr - Hyon Fm	Top NP12	0.921	75.5565	1.93467	4.55772	1.59946	1.14838
89	A24	Ampe Quarry (Belgium)	Falun II	Nummulites aquitanicus	Egem Mbr - Hyon Fm	Top NP12	2.66	80.3158	1.87793	9.03551	1.21171	0.227877
90	A25	Ampe Quarry (Belgium)	Falun II	Nummulites aquitanicus	Egem Mbr - Hyon Fm	Top NP12	1.147	77.015	1.96832	2.39742	0.758162	0.573513
91	A26	Ampe Quarry (Belgium)	Falun II	Nummulites aquitanicus	Egem Mbr - Hyon Fm	Top NP12	1.17	74.8473	1.92797	5.25712	2.10621	0.472239
92	A27	Ampe Quarry (Belgium)	Falun II	Nummulites aquitanicus	Egem Mbr - Hyon Fm	Top NP12	3.112	78.6952	1.92909	3.00739	1.26843	0.24433
93	A28	Ampe Quarry (Belgium)	Falun II	Nummulites aquitanicus	Egem Mbr - Hyon Fm	Top NP12	4.684	78.1454	1.92617	-0.791019	-0.0569295	-0.0408212
94	A29	Ampe Quarry (Belgium)	Falun II	Nummulites aquitanicus	Egem Mbr - Hyon Fm	Top NP12	5.213	79.969	1.89882	-0.440945	-0.0560009	-0.0438302
95	A30	Ampe Quarry (Belgium)	Falun II	Nummulites aquitanicus	Egem Mbr - Hyon Fm	Top NP12	4.691	76.81	1.9395	-0.705027	-0.0731477	-0.0611617
96	A31	Ampe Quarry (Belgium)	Falun II	Nummulites aquitanicus	Egem Mbr - Hyon Fm	Top NP12	4.724	81.6465	1.87008	-0.420244	-0.0609256	-0.0408579
97	A32	Ampe Quarry (Belgium)	Falun II	Nummulites aquitanicus	Egem Mbr - Hyon Fm	Top NP12	4.112	77.7175	1.96148	-0.661228	-0.0534124	-0.0467958
98	A33	Ampe Quarry (Belgium)	Falun II	Nummulites aquitanicus	Egem Mbr - Hyon Fm	Top NP12	4.139	82.2921	1.82614	-0.541151	-0.0649116	-0.041421
99	A34	Ampe Quarry (Belgium)	Falun II	Nummulites aquitanicus	Egem Mbr - Hyon Fm	Top NP12	2.206	73.9188	2.07013	-0.803841	-0.0792564	-0.0915301
100	A35	Ampe Quarry (Belgium)	Falun II	Nummulites aquitanicus	Egem Mbr - Hyon Fm	Top NP12	4.062	76.6427	1.88241	-0.594204	-0.0516661	-0.0403351
101	A36	Ampe Quarry (Belgium)	Falun II	Nummulites aquitanicus	Egem Mbr - Hyon Fm	Top NP12	2.629	70.6079	1.90637	-1.25207	-0.0744558	-0.0747607
102	A37	Ampe Quarry (Belgium)	Falun II	Nummulites aquitanicus	Egem Mbr - Hyon Fm	Top NP12	2.778	79.8735	1.93313	-0.581725	-0.0534945	-0.0445824
103	A38	Ampe Quarry (Belgium)	Falun II	Nummulites aquitanicus	Egem Mbr - Hyon Fm	Top NP12	2.978	77.6807	1.92303	-1.16321	-0.057725	-0.0473748
104	A39	Ampe Quarry (Belgium)	Falun II	Nummulites aquitanicus	Egem Mbr - Hyon Fm	Top NP12	3.026	73.7973	1.90377	-0.493826	-0.0751037	-0.0776934
105	A40	Ampe Quarry (Belgium)	Falun II	Nummulites aquitanicus	Egem Mbr - Hyon Fm	Top NP12	2.287	72.3989	1.95602	-0.480258	-0.0664475	-0.0684796
106	A41	Ampe Quarry (Belgium)	Falun II	Nummulites aquitanicus	Egem Mbr - Hyon Fm	Top NP12	3.081	78.4586	1.91924	-0.784525	-0.0556881	-0.0440865
107	A42	Ampe Quarry (Belgium)	Falun II	Nummulites aquitanicus	Egem Mbr - Hyon Fm	Top NP12	3.025	73.873	1.96273	-0.785589	-0.0718428	-0.0759851
108	A141	Ampe Quarry (Belgium)	Falun II	Nummulites aquitanicus	Egem Mbr - Hyon Fm	Top NP12	1.537	77.9986	1.97067	3.60181	1.13707	0.0713176
109	A142	Ampe Quarry (Belgium)	Falun II	Nummulites aquitanicus	Egem Mbr - Hyon Fm	Top NP12	1.529	80.4937	2.00887	7.86194	1.3934	0
110	A143	Ampe Quarry (Belgium)	Falun II	Nummulites aquitanicus	Egem Mbr - Hyon Fm	Top NP12	1.637	76.4349	2.06358	7.90142	1.15968	0.0859075
111	A144	Ampe Quarry (Belgium)	Falun II	Nummulites aquitanicus	Egem Mbr - Hyon Fm	Top NP12	1.55	73.4775	2.01317	6.13522	1.90059	0.0819372
112	A145	Ampe Quarry (Belgium)	Falun II	Nummulites aquitanicus	Egem Mbr - Hyon Fm	Top NP12	1.707	74.347	1.94411	2.2455	1.3113	0.0518077
113	A146	Ampe Quarry (Belgium)	Falun II	Nummulites aquitanicus	Egem Mbr - Hyon Fm	Top NP12	1.659	82.2881	1.96942	14.2849	1.47158	0.0741088
114	A148	Ampe Quarry (Belgium)	Falun II	Nummulites aquitanicus	Egem Mbr - Hyon Fm	Top NP12	1.602	75.3954	1.95172	3.93407	2.35615	0.121568
115	A149	Ampe Quarry (Belgium)	Falun II	Nummulites aquitanicus	Egem Mbr - Hyon Fm	Top NP12	1.62	71.9343	1.92517	3.75307	2.09866	0.0819565
116	A150	Ampe Quarry (Belgium)	Falun II	Nummulites aquitanicus	Egem Mbr - Hyon Fm	Top NP12	1.706	78.5799	2.02056	15.6125	1.45662	0.0656964
117	A151	Ampe Quarry (Belgium)	Falun II	Nummulites aquitanicus	Egem Mbr - Hyon Fm	Top NP12	1.591	75.1577	1.92063	3.94755	1.60145	0.115305
118	A152	Ampe Quarry (Belgium)	Falun II	Nummulites aquitanicus	Egem Mbr - Hyon Fm	Top NP12	1.607	75.446	1.91939	12.4382	1.80319	0.0643115
119	A153	Ampe Quarry (Belgium)	Falun II	Nummulites aquitanicus	Egem Mbr - Hyon Fm	Top NP12	1.576	76.866	1.96714	13.6618	1.26183	0.101693
120	A154	Ampe Quarry (Belgium)	Falun II	Nummulites aquitanicus	Egem Mbr - Hyon Fm	Top NP12	1.569	73.95	2.05362	2.56837	1.68663	0.0821572
121	A155	Ampe Quarry (Belgium)	Falun II	Nummulites aquitanicus	Egem Mbr - Hyon Fm	Top NP12	1.559	76.61	2.07096	7.24983	1.555	0.104092
122	A156	Ampe Quarry (Belgium)	Falun II	Nummulites aquitanicus	Egem Mbr - Hyon Fm	Top NP12	1.556	76.5027	1.93941	5.63824	0.990136	0.0709943
123	A157	Ampe Quarry (Belgium)	Falun II	Nummulites aquitanicus	Egem Mbr - Hyon Fm	Top NP12	1.618	78.3334	1.93614	8.1584	1.18064	0.0719882
124	A158	Ampe Quarry (Belgium)	Falun II	Nummulites aquitanicus	Egem Mbr - Hyon Fm	Top NP12	1.671	78.1387	1.98761	6.21369	1.47782	0.0708102
125	A159	Ampe Quarry (Belgium)	Falun II	Nummulites aquitanicus	Egem Mbr - Hyon Fm	Top NP12	1.573	78.5519	2.03889	3.9604	1.07936	0.0536816
126	A160	Ampe Quarry (Belgium)	Falun II	Nummulites aquitanicus	Egem Mbr - Hyon Fm	Top NP12	1.626	74.49	1.97631	4.67027	1.43732	0.0785542
127	A161	Ampe Quarry (Belgium)	Falun II	Nummulites aquitanicus	Egem Mbr - Hyon Fm	Top NP12	1.576	73.2464	1.9776	6.21721	1.36616	0.0730627
128	B1	Kester core (Belgium)	46.92-46.95 m	Nummulites involutus	Mons-en-Pévèle Fm	Top NP11	2.902	69.8425	1.82917	1.65826	1.07829	0.3041
129	B2	Kester core (Belgium)	46.92-46.95 m	Nummulites involutus	Mons-en-Pévèle Fm	Top NP11	2.115	64.4829	1.9103	1.85546	0.905691	0.462835
130	B3	Kester core (Belgium)	46.92-46.95 m	Nummulites involutus	Mons-en-Pévèle Fm	Top NP11	0.767	66.9979	1.9207	1.28908	0.816973	2.63916
131	B4	Kester core (Belgium)	46.92-46.95 m	Nummulites involutus	Mons-en-Pévèle Fm	Top NP11	0.915	65.1395	1.83528	2.78805	1.36046	1.76982
132	B5	Kester core (Belgium)	46.92-46.95 m	Nummulites involutus	Mons-en-Pévèle Fm	Top NP11	0.876	63.5974	1.90332	3.94089	1.32972	0.971896
133	B6	Kester core (Belgium)	46.92-46.95 m	Nummulites involutus	Mons-en-Pévèle Fm	Top NP11	1.435	65.2323	1.81653	1.40135	1.09967	0.386864
134	B7	Kester core (Belgium)	46.92-46.95 m	Nummulites involutus	Mons-en-Pévèle Fm	Top NP11	1.488	61.8491	1.76859	1.81199	1.10968	0.348085
135	B8	Kester core (Belgium)	46.92-46.95 m	Nummulites involutus	Mons-en-Pévèle Fm	Top NP11	1.31	61.1437	1.85501	1.54796	0.813969	0.673025
136	B9	Kester core (Belgium)	46.92-46.95 m	Nummulites involutus	Mons-en-Pévèle Fm	Top NP11	1.506	58.3887	1.781	2.85216	2.32134	0.525733
137	B10	Kester core (Belgium)	46.92-46.95 m	Nummulites involutus	Mons-en-Pévèle Fm	Top NP11	1.396	60.9026	1.83101	2.06263	1.31866	0.521537
138	B11	Kester core (Belgium)	46.92-46.95 m	Nummulites involutus	Mons-en-Pévèle Fm	Top NP11	1.002	66.9745	1.91468	1.07415	0.708428	0.586673
139	B12	Kester core (Belgium)	46.92-46.95 m	Nummulites involutus	Mons-en-Pévèle Fm	Top NP11	1.024	68.6343	1.93906	2.1373	0.969035	0.983259
140	B13	Kester core (Belgium)	46.92-46.95 m	Nummulites involutus	Mons-en-Pévèle Fm	Top NP11	1.053	64.6523	1.88627	2.49431	0.846809	1.41439
141	B14	Kester core (Belgium)	46.92-46.95 m	Nummulites involutus	Mons-en-Pévèle Fm	Top NP11	1.058	62.1415	1.9163	1.88832	0.970826	0.653734
142	B15	Kester core (Belgium)	46.92-46.95 m	Nummulites involutus	Mons-en-Pévèle Fm	Top NP11	1.027	62.6122	1.85878	1.95365	0.814701	0.569384
143	B16	Kester core (Belgium)	46.92-46.95 m	Nummulites involutus	Mons-en-Pévèle Fm	Top NP11	0.94	63.6487	1.92092	1.78209	0.665814	0.633222
144	B17	Kester core (Belgium)	46.92-46.95 m	Nummulites involutus	Mons-en-Pévèle Fm	Top NP11	2.108	68.7034	1.83527	1.57387	0.999271	0.316952
145	B18	Kester core (Belgium)	46.92-46.95 m	Nummulites involutus	Mons-en-Pévèle Fm	Top NP11	1.267	61.8989	1.91894	1.5875	0.751945	0.579658
146	B19	Kester core (Belgium)	46.92-46.95 m	Nummulites involutus	Mons-en-Pévèle Fm	Top NP11	1.502	62.1341	1.84717	2.59452	1.2664	0.427386
147	B20	Kester core (Belgium)	46.92-46.95 m	Nummulites involutus	Mons-en-Pévèle Fm	Top NP11	1.043	59.7118	1.78666	1.78451	1.39783	0.368716
148	B21	Kester core (Belgium)	46.92-46.95 m	Nummulites involutus	Mons-en-Pévèle Fm	Top NP11	1.906	64.7188	1.83069	1.66593	0.756733	0.378569
149	B22	Kester core (Belgium)	46.92-46.95 m	Nummulites involutus	Mons-en-Pévèle Fm	Top NP11	1.196	65.2844	1.91816	1.79959	1.01481	1.11211
150	B23	Kester core (Belgium)	46.92-46.95 m	Nummulites involutus	Mons-en-Pévèle Fm	Top NP11	0.795	57.3667	1.46786	6.53483	3.01905	0.447812
151	B24	Kester core (Belgium)	46.92-46.95 m	Nummulites involutus	Mons-en-Pévèle Fm	Top NP11	2.371	64.9213	1.95981	-0.324931	-0.0556601	-0.0691447
152	B25	Kester core (Belgium)	46.92-46.95 m	Nummulites involutus	Mons-en-Pévèle Fm	Top NP11	2.924	66.6361	1.85347	-0.303612	-0.0531091	-0.0538495
153	B26	Kester core (Belgium)	46.92-46.95 m	Nummulites involutus	Mons-en-Pévèle Fm	Top NP11	2.523	63.381	1.87514	-0.373288	-0.0695147	-0.065015
154	B27	Kester core (Belgium)	46.92-46.95 m	Nummulites involutus	Mons-en-Pévèle Fm	Top NP11	2.448	62.3045	1.85584	-0.498498	-0.0818432	-0.098849
155	B28	Kester core (Belgium)	46.92-46.95 m	Nummulites involutus	Mons-en-Pévèle Fm	Top NP11	2.197	59.34	1.9268	-0.498766	-0.0713954	-0.0887827
156	B29	Kester core (Belgium)	46.92-46.95 m	Nummulites involutus	Mons-en-Pévèle Fm	Top NP11	2.685	65.1657	1.82804	-0.362378	-0.0708163	-0.0486915
157	B30	Kester core (Belgium)	46.92-46.95 m	Nummulites involutus	Mons-en-Pévèle Fm	Top NP11	1.46	59.0072	1.83538	-0.371716	-0.0660686	-0.0757891
158	B31	Kester core (Belgium)	46.92-46.95 m	Nummulites involutus	Mons-en-Pévèle Fm	Top NP11	2.366	65.9873	1.96221	-0.321514	-0.0617324	-0.0610859
159	B32	Kester core (Belgium)	46.92-46.95 m	Nummulites involutus	Mons-en-Pévèle Fm	Top NP11	2.59	64.8142	1.92996	-0.330714	-0.0574729	-0.0621086
160	B33	Kester core (Belgium)	46.92-46.95 m	Nummulites involutus	Mons-en-Pévèle Fm	Top NP11	1.8	65.3495	1.88634	-0.285883	-0.0495028	-0.0598633
161	91a	Kester core (Belgium)	46.92-46.95 m	Nummulites involutus	Mons-en-Pévèle Fm	Top NP11	3	65.9334	1.85697	2.42673	1.4294	0.196262
162	92a	Kester core (Belgium)	46.92-46.95 m	Nummulites involutus	Mons-en-Pévèle Fm	Top NP11	3.13	68.0914	1.7276	1.79905	0.938196	0.143591
163	93a	Kester core (Belgium)	46.92-46.95 m	Nummulites involutus	Mons-en-Pévèle Fm	Top NP11	2.829	67.3542	1.84809	1.91309	1.08611	0.238642
164	94a	Kester core (Belgium)	46.92-46.95 m	Nummulites involutus	Mons-en-Pévèle Fm	Top NP11	2.927	67.8331	1.84457	1.46175	0.685533	0.150943
165	95a	Kester core (Belgium)	46.92-46.95 m	Nummulites involutus	Mons-en-Pévèle Fm	Top NP11	3.304	67.0082	1.78788	2.28853	1.59514	0.133269
166	96a	Kester core (Belgium)	46.92-46.95 m	Nummulites involutus	Mons-en-Pévèle Fm	Top NP11	3.216	66.8147	1.82087	2.57431	1.34689	0.168005
167	C1	Kester core (Belgium)	42.95-43.00 m	Nummulites involutus	Mons-en-Pévèle Fm	Top NP11	1.616	69.8078	1.75473	2.40579	1.24412	0.373399
168	C2	Kester core (Belgium)	42.95-43.00 m	Nummulites involutus	Mons-en-Pévèle Fm	Top NP11	1.721	73.2303	1.81037	1.57255	0.681604	0.356097
169	C3	Kester core (Belgium)	42.95-43.00 m	Nummulites involutus	Mons-en-Pévèle Fm	Top NP11	1.1775	75.2249	1.80712	1.68483	0.794784	0.399678
170	C4	Kester core (Belgium)	42.95-43.00 m	Nummulites involutus	Mons-en-Pévèle Fm	Top NP11	1.944	77.5154	1.83032	1.55993	0.844782	0.321171
171	C5	Kester core (Belgium)	42.95-43.00 m	Nummulites involutus	Mons-en-Pévèle Fm	Top NP11	1.826	70.4285	1.70651	3.01765	1.64953	0.40109
172	C6	Kester core (Belgium)	42.95-43.00 m	Nummulites involutus	Mons-en-Pévèle Fm	Top NP11	1.924	71.7842	1.75549	2.32431	1.04335	0.295446
173	C7	Kester core (Belgium)	42.95-43.00 m	Nummulites involutus	Mons-en-Pévèle Fm	Top NP11	1.728	74.1831	1.75646	1.9904	0.77147	0.473959
174	C8	Kester core (Belgium)	42.95-43.00 m	Nummulites involutus	Mons-en-Pévèle Fm	Top NP11	1.714	75.8339	1.85261	1.57109	0.597346	1.0439
175	C9	Kester core (Belgium)	42.95-43.00 m	Nummulites involutus	Mons-en-Pévèle Fm	Top NP11	1.734	50.4217	1.36073	8.3818	3.10365	0.373911
176	C10	Kester core (Belgium)	42.95-43.00 m	Nummulites involutus	Mons-en-Pévèle Fm	Top NP11	1.71	50.4217	1.36073	8.3818	3.10365	0.373911
177	C11	Kester core (Belgium)	42.95-43.00 m	Nummulites involutus	Mons-en-Pévèle Fm	Top NP11	2.433	70.3675	1.87479	-0.363155	-0.0562023	-0.0757296
178	C12	Kester core (Belgium)	42.95-43.00 m	Nummulites involutus	Mons-en-Pévèle Fm	Top NP11	3.031	63.1895	1.75574	-0.496327	-0.0615099	-0.0538578
179	C13	Kester core (Belgium)	42.95-43.00 m	Nummulites involutus	Mons-en-Pévèle Fm	Top NP11	2.004	67.7257	1.90842	-0.476518	-0.0783742	-0.0958677
180	C14	Kester core (Belgium)	42.95-43.00 m	Nummulites involutus	Mons-en-Pévèle Fm	Top NP11	2.579	66.7851	1.74509	-0.563701	-0.0722467	-0.0643526
181	C15	Kester core (Belgium)	42.95-43.00 m	Nummulites involutus	Mons-en-Pévèle Fm	Top NP11	1.832	59.5025	1.73779	-0.676891	-0.091591	-0.0945974
182	C16	Kester core (Belgium)	42.95-43.00 m	Nummulites involutus	Mons-en-Pévèle Fm	Top NP11	2.078	67.5903	1.83181	-0.430352	-0.0567672	-0.0582412
183	C17	Kester core (Belgium)	42.95-43.00 m	Nummulites involutus	Mons-en-Pévèle Fm	Top NP11	1.816	70.2403	1.92194	-0.369703	-0.0575178	-0.0651098
184	C18	Kester core (Belgium)	42.95-43.00 m	Nummulites involutus	Mons-en-Pévèle Fm	Top NP11	1.571	72.046	1.88436	-0.379894	-0.0545633	-0.0625483
185	C19	Kester core (Belgium)	42.95-43.00 m	Nummulites involutus	Mons-en-Pévèle Fm	Top NP11	1.615	71.6248	1.96197	-0.353787	-0.0545023	-0.0736097
186	C20	Kester core (Belgium)	42.95-43.00 m	Nummulites involutus	Mons-en-Pévèle Fm	Top NP11	1.593	70.0066	1.87506	-0.389282	-0.0603761	-0.0711792
187	C21	Kester core (Belgium)	42.95-43.00 m	Nummulites involutus	Mons-en-Pévèle Fm	Top NP11	1.472	65.6174	1.9579	-0.386991	-0.059606	-0.0905381
188	C22	Kester core (Belgium)	42.95-43.00 m	Nummulites involutus	Mons-en-Pévèle Fm	Top NP11	1.385	59.3399	1.72201	-0.696638	-0.0859095	-0.0597899
189	C23	Kester core (Belgium)	42.95-43.00 m	Nummulites involutus	Mons-en-Pévèle Fm	Top NP11	1.133	56.9624	1.63862	-0.989738	-0.126014	-0.115808
190	C24	Kester core (Belgium)	42.95-43.00 m	Nummulites involutus	Mons-en-Pévèle Fm	Top NP11	1.147	66.5048	1.92063	-0.460726	-0.0719337	-0.111518
191	C25	Kester core (Belgium)	42.95-43.00 m	Nummulites involutus	Mons-en-Pévèle Fm	Top NP11	1.003	53.7367	1.4306	-1.38623	-0.174157	-0.168773
192	C26	Kester core (Belgium)	42.95-43.00 m	Nummulites involutus	Mons-en-Pévèle Fm	Top NP11	0.74	55.3307	1.56584	-1.54158	-0.250876	-0.342602
193	76d	Kester core (Belgium)	42.95-43.00 m	Nummulites involutus	Mons-en-Pévèle Fm	Top NP11	3.102	75.1147	1.80038	1.56782	0.640985	0.219987
194	77d	Kester core (Belgium)	42.95-43.00 m	Nummulites involutus	Mons-en-Pévèle Fm	Top NP11	3.004	81.7613	1.93399	2.01469	0.675588	0.290445
195	78d	Kester core (Belgium)	42.95-43.00 m	Nummulites involutus	Mons-en-Pévèle Fm	Top NP11	2.965	76.5955	1.8485	1.69067	0.39549	0.253112
196	79d	Kester core (Belgium)	42.95-43.00 m	Nummulites involutus	Mons-en-Pévèle Fm	Top NP11	3.174	69.7288	1.75135	1.80956	0.905793	0
197	80d	Kester core (Belgium)	42.95-43.00 m	Nummulites involutus	Mons-en-Pévèle Fm	Top NP11	3.252	78.1877	1.76688	1.28688	0.485843	0
198	81d	Kester core (Belgium)	42.95-43.00 m	Nummulites involutus	Mons-en-Pévèle Fm	Top NP11	3.04	78.3095	1.79513	1.19075	0.440744	0.242631
199	82d	Kester core (Belgium)	42.95-43.00 m	Nummulites involutus	Mons-en-Pévèle Fm	Top NP11	2.815	73.2384	1.78096	1.38888	0.456932	0
200	83d	Kester core (Belgium)	42.95-43.00 m	Nummulites involutus	Mons-en-Pévèle Fm	Top NP11	3.222	73.5399	1.78452	1.62861	0.526185	0.23166
201	84d	Kester core (Belgium)	42.95-43.00 m	Nummulites involutus	Mons-en-Pévèle Fm	Top NP11	2.707	72.7882	1.8312	1.93426	0.600196	0.297086
202	85d	Kester core (Belgium)	42.95-43.00 m	Nummulites involutus	Mons-en-Pévèle Fm	Top NP11	3.018	73.6467	1.82279	1.01717	0.313673	0.206725

## Sheet: Cleaning-Data
Nr	ID	Location	sample level	Nummulites species	Member-Formation	NP-zone	Radius	Cleaning procedure	Time (minutes)	Mg/Ca mmol/mol	Sr/Ca mmol/mol	Fe/Ca mmol/mol	Mn/Ca mmol/mol	Al/Ca mmol/mol		Abbreviation	Step	Chemical
1	A141	Ampe Quarry (Belgium)	Falun II	Nummulites aquitanicus	Egem Mbr - Hyon Fm	Top NP12	1.537	N	15	77.9986	1.97067	3.60181	1.13707	0.0713176		N	External clay removal	Ethanol
2	A142	Ampe Quarry (Belgium)	Falun II	Nummulites aquitanicus	Egem Mbr - Hyon Fm	Top NP12	1.529	N	15	80.4937	2.00887	7.86194	1.3934	DL		M	Internal & external clay removal	Ethanol + Methanol
3	A143	Ampe Quarry (Belgium)	Falun II	Nummulites aquitanicus	Egem Mbr - Hyon Fm	Top NP12	1.637	N	15	76.4349	2.06358	7.90142	1.15968	0.0859075		A	Leaching	Nitric Acid
4	A144	Ampe Quarry (Belgium)	Falun II	Nummulites aquitanicus	Egem Mbr - Hyon Fm	Top NP12	1.55	N	15	73.4775	2.01317	6.13522	1.90059	0.0819372		R	Reduction to remove Mn	Hydrazine
5	A145	Ampe Quarry (Belgium)	Falun II	Nummulites aquitanicus	Egem Mbr - Hyon Fm	Top NP12	1.707	N	15	74.347	1.94411	2.2455	1.3113	0.0518077		O	Oxidation to remove Fe	Peroxide
6	A146	Ampe Quarry (Belgium)	Falun II	Nummulites aquitanicus	Egem Mbr - Hyon Fm	Top NP12	1.659	N	15	82.2881	1.96942	14.2849	1.47158	0.0741088
7	A148	Ampe Quarry (Belgium)	Falun II	Nummulites aquitanicus	Egem Mbr - Hyon Fm	Top NP12	1.602	N	15	75.3954	1.95172	3.93407	2.35615	0.121568
8	A149	Ampe Quarry (Belgium)	Falun II	Nummulites aquitanicus	Egem Mbr - Hyon Fm	Top NP12	1.62	N	15	71.9343	1.92517	3.75307	2.09866	0.0819565
9	A150	Ampe Quarry (Belgium)	Falun II	Nummulites aquitanicus	Egem Mbr - Hyon Fm	Top NP12	1.706	N	15	78.5799	2.02056	15.6125	1.45662	0.0656964
10	A151	Ampe Quarry (Belgium)	Falun II	Nummulites aquitanicus	Egem Mbr - Hyon Fm	Top NP12	1.591	N	15	75.1577	1.92063	3.94755	1.60145	0.115305
11	A152	Ampe Quarry (Belgium)	Falun II	Nummulites aquitanicus	Egem Mbr - Hyon Fm	Top NP12	1.607	N	15	75.446	1.91939	12.4382	1.80319	0.0643115
12	A153	Ampe Quarry (Belgium)	Falun II	Nummulites aquitanicus	Egem Mbr - Hyon Fm	Top NP12	1.576	N	15	76.866	1.96714	13.6618	1.26183	0.101693
13	A154	Ampe Quarry (Belgium)	Falun II	Nummulites aquitanicus	Egem Mbr - Hyon Fm	Top NP12	1.569	N	15	73.95	2.05362	2.56837	1.68663	0.0821572
14	A155	Ampe Quarry (Belgium)	Falun II	Nummulites aquitanicus	Egem Mbr - Hyon Fm	Top NP12	1.559	N	15	76.61	2.07096	7.24983	1.555	0.104092
15	A156	Ampe Quarry (Belgium)	Falun II	Nummulites aquitanicus	Egem Mbr - Hyon Fm	Top NP12	1.556	N	15	76.5027	1.93941	5.63824	0.990136	0.0709943
16	A157	Ampe Quarry (Belgium)	Falun II	Nummulites aquitanicus	Egem Mbr - Hyon Fm	Top NP12	1.618	N	15	78.3334	1.93614	8.1584	1.18064	0.0719882
17	A158	Ampe Quarry (Belgium)	Falun II	Nummulites aquitanicus	Egem Mbr - Hyon Fm	Top NP12	1.671	N	15	78.1387	1.98761	6.21369	1.47782	0.0708102
18	A159	Ampe Quarry (Belgium)	Falun II	Nummulites aquitanicus	Egem Mbr - Hyon Fm	Top NP12	1.573	N	15	78.5519	2.03889	3.9604	1.07936	0.0536816
19	A160	Ampe Quarry (Belgium)	Falun II	Nummulites aquitanicus	Egem Mbr - Hyon Fm	Top NP12	1.626	N	15	74.49	1.97631	4.67027	1.43732	0.0785542
20	A161	Ampe Quarry (Belgium)	Falun II	Nummulites aquitanicus	Egem Mbr - Hyon Fm	Top NP12	1.576	N	15	73.2464	1.9776	6.21721	1.36616	0.0730627
21	A127	Ampe Quarry (Belgium)	Falun II	Nummulites aquitanicus	Egem Mbr - Hyon Fm	Top NP12	1.65	M	18	76.758	1.88885	4.64388	2.25516	0.0741298
22	A128	Ampe Quarry (Belgium)	Falun II	Nummulites aquitanicus	Egem Mbr - Hyon Fm	Top NP12	1.613	M	18	77.4859	1.94684	9.62027	1.66246	0.0717475
23	A129	Ampe Quarry (Belgium)	Falun II	Nummulites aquitanicus	Egem Mbr - Hyon Fm	Top NP12	1.655	M	18	73.3546	1.96427	8.27755	1.64548	0.0985147
24	A130	Ampe Quarry (Belgium)	Falun II	Nummulites aquitanicus	Egem Mbr - Hyon Fm	Top NP12	1.53	M	18	76.7652	2.04275	3.36224	1.37038	0.0731795
25	A131	Ampe Quarry (Belgium)	Falun II	Nummulites aquitanicus	Egem Mbr - Hyon Fm	Top NP12	1.606	M	18	75.9673	2.01086	6.6205	0.981076	0.099274
26	A132	Ampe Quarry (Belgium)	Falun II	Nummulites aquitanicus	Egem Mbr - Hyon Fm	Top NP12	1.538	M	18	75.8348	2.04142	6.50979	0.756303	DL
27	A133	Ampe Quarry (Belgium)	Falun II	Nummulites aquitanicus	Egem Mbr - Hyon Fm	Top NP12	1.616	M	18	76.6019	2.05515	10.2081	1.15328	0.0929635
28	A134	Ampe Quarry (Belgium)	Falun II	Nummulites aquitanicus	Egem Mbr - Hyon Fm	Top NP12	1.632	M	18	77.2259	2.01887	2.84185	0.875198	0.0581931
29	A135	Ampe Quarry (Belgium)	Falun II	Nummulites aquitanicus	Egem Mbr - Hyon Fm	Top NP12	1.601	M	18	74.6421	1.9965	3.28586	1.30984	0.0657435
30	A136	Ampe Quarry (Belgium)	Falun II	Nummulites aquitanicus	Egem Mbr - Hyon Fm	Top NP12	1.569	M	18	76.2357	2.016	5.95989	1.26347	0.0753958
31	A137	Ampe Quarry (Belgium)	Falun II	Nummulites aquitanicus	Egem Mbr - Hyon Fm	Top NP12	1.612	M	18	77.6351	1.87689	3.60722	1.44225	DL
32	A138	Ampe Quarry (Belgium)	Falun II	Nummulites aquitanicus	Egem Mbr - Hyon Fm	Top NP12	1.663	M	18	76.5323	2.06155	40.1198	1.09965	0.0657077
33	A139	Ampe Quarry (Belgium)	Falun II	Nummulites aquitanicus	Egem Mbr - Hyon Fm	Top NP12	1.687	M	18	78.152	2.05464	4.38179	1.64554	0.0576772
34	A85	Ampe Quarry (Belgium)	Falun II	Nummulites aquitanicus	Egem Mbr - Hyon Fm	Top NP12	1.693	M+A	18.5	75.3484	1.87859	4.62796	2.27022	0.104148
35	A86	Ampe Quarry (Belgium)	Falun II	Nummulites aquitanicus	Egem Mbr - Hyon Fm	Top NP12	1.606	M+A	18.5	79.459	2.09306	5.47246	1.28589	0.0606662
36	A87	Ampe Quarry (Belgium)	Falun II	Nummulites aquitanicus	Egem Mbr - Hyon Fm	Top NP12	1.606	M+A	18.5	77.923	1.92145	3.00448	0.954677	0.0586434
37	A88	Ampe Quarry (Belgium)	Falun II	Nummulites aquitanicus	Egem Mbr - Hyon Fm	Top NP12	1.543	M+A	18.5	76.8517	1.97183	8.27222	1.12152	0.0721207
38	A89	Ampe Quarry (Belgium)	Falun II	Nummulites aquitanicus	Egem Mbr - Hyon Fm	Top NP12	1.624	M+A	18.5	79.1247	2.11833	6.20043	0.962515	0.0845598
39	A90	Ampe Quarry (Belgium)	Falun II	Nummulites aquitanicus	Egem Mbr - Hyon Fm	Top NP12	1.575	M+A	18.5	70.6449	1.99621	3.747	2.05729	0.0681335
40	A91	Ampe Quarry (Belgium)	Falun II	Nummulites aquitanicus	Egem Mbr - Hyon Fm	Top NP12	1.624	M+A	18.5	76.2752	1.97363	5.71689	1.55543	0.0883948
41	A92	Ampe Quarry (Belgium)	Falun II	Nummulites aquitanicus	Egem Mbr - Hyon Fm	Top NP12	1.601	M+A	18.5	73.1343	1.90626	6.78094	1.87328	0.0955918
42	A93	Ampe Quarry (Belgium)	Falun II	Nummulites aquitanicus	Egem Mbr - Hyon Fm	Top NP12	1.554	M+A	18.5	68.8578	1.80972	10.9654	2.72912	0.108403
43	A94	Ampe Quarry (Belgium)	Falun II	Nummulites aquitanicus	Egem Mbr - Hyon Fm	Top NP12	1.559	M+A	18.5	79.4302	1.99578	5.7779	1.45771	0.088106
44	A95	Ampe Quarry (Belgium)	Falun II	Nummulites aquitanicus	Egem Mbr - Hyon Fm	Top NP12	1.558	M+A	18.5	79.3555	2.08648	4.40147	1.3917	0.129185
45	A96	Ampe Quarry (Belgium)	Falun II	Nummulites aquitanicus	Egem Mbr - Hyon Fm	Top NP12	1.592	M+A	18.5	78.4198	2.14085	7.9016	1.30262	0.0754197
46	A97	Ampe Quarry (Belgium)	Falun II	Nummulites aquitanicus	Egem Mbr - Hyon Fm	Top NP12	1.588	M+A	18.5	76.6734	1.98809	4.22753	1.39647	0.0740576
47	A71	Ampe Quarry (Belgium)	Falun II	Nummulites aquitanicus	Egem Mbr - Hyon Fm	Top NP12	1.655	M+O	23	77.9177	2.06802	2.74297	1.97964	0.0912039
48	A72	Ampe Quarry (Belgium)	Falun II	Nummulites aquitanicus	Egem Mbr - Hyon Fm	Top NP12	1.571	M+O	23	75.131	1.83859	12.2915	1.41768	0.0851359
49	A73	Ampe Quarry (Belgium)	Falun II	Nummulites aquitanicus	Egem Mbr - Hyon Fm	Top NP12	1.552	M+O	23	77.6067	1.8951	3.14015	1.81869	0.0876445
50	A74	Ampe Quarry (Belgium)	Falun II	Nummulites aquitanicus	Egem Mbr - Hyon Fm	Top NP12	1.657	M+O	23	77.1351	1.87359	4.90011	1.78151	0.0739184
51	A75	Ampe Quarry (Belgium)	Falun II	Nummulites aquitanicus	Egem Mbr - Hyon Fm	Top NP12	1.602	M+O	23	77.0402	1.94899	2.60587	1.03858	0.0568322
52	A76	Ampe Quarry (Belgium)	Falun II	Nummulites aquitanicus	Egem Mbr - Hyon Fm	Top NP12	1.616	M+O	23	76.8876	2.02611	2.96028	1.61246	0.107823
53	A77	Ampe Quarry (Belgium)	Falun II	Nummulites aquitanicus	Egem Mbr - Hyon Fm	Top NP12	1.59	M+O	23	79.324	2.03541	3.99117	1.21483	0.0731121
54	A78	Ampe Quarry (Belgium)	Falun II	Nummulites aquitanicus	Egem Mbr - Hyon Fm	Top NP12	1.618	M+O	23	75.8252	1.96911	2.16024	0.971126	0.09848
55	A79	Ampe Quarry (Belgium)	Falun II	Nummulites aquitanicus	Egem Mbr - Hyon Fm	Top NP12	1.656	M+O	23	74.8042	2.11659	5.75157	1.39067	0.0672918
56	A80	Ampe Quarry (Belgium)	Falun II	Nummulites aquitanicus	Egem Mbr - Hyon Fm	Top NP12	1.559	M+O	23	74.0686	2.04278	4.90494	1.03094	0.0823978
57	A81	Ampe Quarry (Belgium)	Falun II	Nummulites aquitanicus	Egem Mbr - Hyon Fm	Top NP12	1.576	M+O	23	75.7518	2.01547	4.14345	1.72065	0.116238
58	A82	Ampe Quarry (Belgium)	Falun II	Nummulites aquitanicus	Egem Mbr - Hyon Fm	Top NP12	1.684	M+O	23	83.2028	1.99618	8.03562	1.40372	0.0461915
59	A83	Ampe Quarry (Belgium)	Falun II	Nummulites aquitanicus	Egem Mbr - Hyon Fm	Top NP12	1.615	M+O	23	77.5828	2.00033	4.57645	0.94769	0.116343
60	A113	Ampe Quarry (Belgium)	Falun II	Nummulites aquitanicus	Egem Mbr - Hyon Fm	Top NP12	1.558	M+O+A	23.5	75.9586	1.99821	5.18778	1.56157	0.069926
61	A114	Ampe Quarry (Belgium)	Falun II	Nummulites aquitanicus	Egem Mbr - Hyon Fm	Top NP12	1.623	M+O+A	23.5	80.1647	2.01782	6.68999	1.18236	0.0649884
62	A115	Ampe Quarry (Belgium)	Falun II	Nummulites aquitanicus	Egem Mbr - Hyon Fm	Top NP12	1.68	M+O+A	23.5	84.1439	2.05552	6.63135	1.42244	0.0667941
63	A116	Ampe Quarry (Belgium)	Falun II	Nummulites aquitanicus	Egem Mbr - Hyon Fm	Top NP12	1.637	M+O+A	23.5	79.541	2.02118	3.42778	1.25452	0.0532485
64	A117	Ampe Quarry (Belgium)	Falun II	Nummulites aquitanicus	Egem Mbr - Hyon Fm	Top NP12	1.642	M+O+A	23.5	77.8923	2.08616	4.72595	1.30302	0.0534763
65	A118	Ampe Quarry (Belgium)	Falun II	Nummulites aquitanicus	Egem Mbr - Hyon Fm	Top NP12	1.63	M+O+A	23.5	73.2432	1.92903	4.24573	1.07964	0.05782
66	A119	Ampe Quarry (Belgium)	Falun II	Nummulites aquitanicus	Egem Mbr - Hyon Fm	Top NP12	1.532	M+O+A	23.5	79.5172	2.06456	3.8036	1.61361	DL
67	A120	Ampe Quarry (Belgium)	Falun II	Nummulites aquitanicus	Egem Mbr - Hyon Fm	Top NP12	1.669	M+O+A	23.5	76.9351	1.97129	3.03119	1.39491	0.047038
68	A121	Ampe Quarry (Belgium)	Falun II	Nummulites aquitanicus	Egem Mbr - Hyon Fm	Top NP12	1.606	M+O+A	23.5	79.955	2.08844	5.05866	0.979222	DL
69	A122	Ampe Quarry (Belgium)	Falun II	Nummulites aquitanicus	Egem Mbr - Hyon Fm	Top NP12	1.577	M+O+A	23.5	76.5269	1.95961	3.90567	1.07815	0.0693899
70	A123	Ampe Quarry (Belgium)	Falun II	Nummulites aquitanicus	Egem Mbr - Hyon Fm	Top NP12	1.674	M+O+A	23.5	81.2829	2.08854	1.8156	1.19798	0.0893125
71	A124	Ampe Quarry (Belgium)	Falun II	Nummulites aquitanicus	Egem Mbr - Hyon Fm	Top NP12	1.581	M+O+A	23.5	74.2584	2.0197	5.5478	1.29202	0.0694465
72	A125	Ampe Quarry (Belgium)	Falun II	Nummulites aquitanicus	Egem Mbr - Hyon Fm	Top NP12	1.619	M+O+A	23.5	78.6902	2.0548	2.99023	1.03726	DL
73	A57	Ampe Quarry (Belgium)	Falun II	Nummulites aquitanicus	Egem Mbr - Hyon Fm	Top NP12	1.622	M+R	28	78.2128	2.0309	2.24941	1.26174	0.105011
74	A58	Ampe Quarry (Belgium)	Falun II	Nummulites aquitanicus	Egem Mbr - Hyon Fm	Top NP12	1.63	M+R	28	79.041	1.99724	5.98345	1.55413	0.142705
75	A59	Ampe Quarry (Belgium)	Falun II	Nummulites aquitanicus	Egem Mbr - Hyon Fm	Top NP12	1.571	M+R	28	73.9044	2.10173	1.3722	0.46565	0.0591058
76	A60	Ampe Quarry (Belgium)	Falun II	Nummulites aquitanicus	Egem Mbr - Hyon Fm	Top NP12	1.609	M+R	28	75.9086	1.99564	14.9003	1.3796	0.0939642
77	A61	Ampe Quarry (Belgium)	Falun II	Nummulites aquitanicus	Egem Mbr - Hyon Fm	Top NP12	1.632	M+R	28	77.2866	1.98961	7.36994	1.67491	0.120842
78	A62	Ampe Quarry (Belgium)	Falun II	Nummulites aquitanicus	Egem Mbr - Hyon Fm	Top NP12	1.676	M+R	28	76.1866	2.02529	2.15387	1.61579	0.0746597
79	A63	Ampe Quarry (Belgium)	Falun II	Nummulites aquitanicus	Egem Mbr - Hyon Fm	Top NP12	1.579	M+R	28	77.1343	2.00481	3.3656	1.1255	0.113309
80	A64	Ampe Quarry (Belgium)	Falun II	Nummulites aquitanicus	Egem Mbr - Hyon Fm	Top NP12	1.693	M+R	28	76.2032	1.96558	4.77582	1.08091	0.0685418
81	A65	Ampe Quarry (Belgium)	Falun II	Nummulites aquitanicus	Egem Mbr - Hyon Fm	Top NP12	1.609	M+R	28	73.6504	2.08593	3.87129	1.05017	0.0863305
82	A66	Ampe Quarry (Belgium)	Falun II	Nummulites aquitanicus	Egem Mbr - Hyon Fm	Top NP12	1.612	M+R	28	72.5165	1.93048	2.03888	1.28615	0.0864329
83	A67	Ampe Quarry (Belgium)	Falun II	Nummulites aquitanicus	Egem Mbr - Hyon Fm	Top NP12	1.682	M+R	28	74.9173	2.00072	5.12904	0.991659	0.0724644
84	A68	Ampe Quarry (Belgium)	Falun II	Nummulites aquitanicus	Egem Mbr - Hyon Fm	Top NP12	1.673	M+R	28	71.6494	2.02694	5.33766	1.37679	0.0717382
85	A69	Ampe Quarry (Belgium)	Falun II	Nummulites aquitanicus	Egem Mbr - Hyon Fm	Top NP12	1.63	M+R	28	79.5688	1.9681	5.51878	1.09045	0.058645
86	A99	Ampe Quarry (Belgium)	Falun II	Nummulites aquitanicus	Egem Mbr - Hyon Fm	Top NP12	1.691	M+O+R	33	81.2663	2.06297	5.5634	1.12507	0.0436211
87	A100	Ampe Quarry (Belgium)	Falun II	Nummulites aquitanicus	Egem Mbr - Hyon Fm	Top NP12	1.586	M+O+R	33	74.437	2.00092	1.69476	1.04361	DL
88	A101	Ampe Quarry (Belgium)	Falun II	Nummulites aquitanicus	Egem Mbr - Hyon Fm	Top NP12	1.629	M+O+R	33	78.4899	2.0308	2.67524	1.24474	DL
89	A102	Ampe Quarry (Belgium)	Falun II	Nummulites aquitanicus	Egem Mbr - Hyon Fm	Top NP12	1.578	M+O+R	33	73.8426	1.91842	8.53492	1.73814	0.0909473
90	A103	Ampe Quarry (Belgium)	Falun II	Nummulites aquitanicus	Egem Mbr - Hyon Fm	Top NP12	1.613	M+O+R	33	76.3657	2.02808	1.97215	1.05907	0.0502154
91	A104	Ampe Quarry (Belgium)	Falun II	Nummulites aquitanicus	Egem Mbr - Hyon Fm	Top NP12	1.596	M+O+R	33	77.4636	1.96855	3.58213	0.99838	0.0561837
92	A105	Ampe Quarry (Belgium)	Falun II	Nummulites aquitanicus	Egem Mbr - Hyon Fm	Top NP12	1.681	M+O+R	33	75.855	2.01415	2.20997	1.29842	0.0508345
93	A106	Ampe Quarry (Belgium)	Falun II	Nummulites aquitanicus	Egem Mbr - Hyon Fm	Top NP12	1.532	M+O+R	33	74.91	1.97013	2.38038	1.37207	DL
94	A107	Ampe Quarry (Belgium)	Falun II	Nummulites aquitanicus	Egem Mbr - Hyon Fm	Top NP12	1.522	M+O+R	33	79.606	2.15218	1.89361	1.01046	DL
95	A108	Ampe Quarry (Belgium)	Falun II	Nummulites aquitanicus	Egem Mbr - Hyon Fm	Top NP12	1.603	M+O+R	33	76.9025	2.12355	4.10023	1.67921	DL
96	A109	Ampe Quarry (Belgium)	Falun II	Nummulites aquitanicus	Egem Mbr - Hyon Fm	Top NP12	1.662	M+O+R	33	78.2983	1.97068	1.60023	1.26721	DL
97	A110	Ampe Quarry (Belgium)	Falun II	Nummulites aquitanicus	Egem Mbr - Hyon Fm	Top NP12	1.692	M+O+R	33	74.3118	1.89509	3.74653	1.78349	0.0683782
98	A111	Ampe Quarry (Belgium)	Falun II	Nummulites aquitanicus	Egem Mbr - Hyon Fm	Top NP12	1.581	M+O+R	33	78.2321	2.03649	6.54875	1.15905	0.100175
99	A43	Ampe Quarry (Belgium)	Falun II	Nummulites aquitanicus	Egem Mbr - Hyon Fm	Top NP12	1.665	M+O+R+A	33.5	75.5761	1.89424	1.69763	1.07487	0.100255
100	A44	Ampe Quarry (Belgium)	Falun II	Nummulites aquitanicus	Egem Mbr - Hyon Fm	Top NP12	1.624	M+O+R+A	33.5	74.6665	2.08482	1.52485	1.24291	0.120729
101	A45	Ampe Quarry (Belgium)	Falun II	Nummulites aquitanicus	Egem Mbr - Hyon Fm	Top NP12	1.623	M+O+R+A	33.5	75.5059	1.93403	2.14369	1.23049	0.259667
102	A46	Ampe Quarry (Belgium)	Falun II	Nummulites aquitanicus	Egem Mbr - Hyon Fm	Top NP12	1.65	M+O+R+A	33.5	78.23	2.21683	1.47653	0.755944	0.244125
103	A47	Ampe Quarry (Belgium)	Falun II	Nummulites aquitanicus	Egem Mbr - Hyon Fm	Top NP12	1.615	M+O+R+A	33.5	77.034	2.06894	2.51945	1.24594	0.101473
104	A48	Ampe Quarry (Belgium)	Falun II	Nummulites aquitanicus	Egem Mbr - Hyon Fm	Top NP12	1.598	M+O+R+A	33.5	80.1487	2.21467	2.01127	1.04504	0.134311
105	A49	Ampe Quarry (Belgium)	Falun II	Nummulites aquitanicus	Egem Mbr - Hyon Fm	Top NP12	1.66	M+O+R+A	33.5	74.9944	1.99992	2.40266	1.34295	0.0628717
106	A50	Ampe Quarry (Belgium)	Falun II	Nummulites aquitanicus	Egem Mbr - Hyon Fm	Top NP12	1.644	M+O+R+A	33.5	73.6899	2.05443	2.09857	1.42182	0.135374
107	A51	Ampe Quarry (Belgium)	Falun II	Nummulites aquitanicus	Egem Mbr - Hyon Fm	Top NP12	1.687	M+O+R+A	33.5	73.4787	2.05354	1.31006	0.807971	0.0479609
108	A52	Ampe Quarry (Belgium)	Falun II	Nummulites aquitanicus	Egem Mbr - Hyon Fm	Top NP12	1.619	M+O+R+A	33.5	79.8146	2.11606	1.75416	1.02222	0.0602124
109	A53	Ampe Quarry (Belgium)	Falun II	Nummulites aquitanicus	Egem Mbr - Hyon Fm	Top NP12	1.614	M+O+R+A	33.5	79.5896	2.09242	3.00499	1.61697	0.155235
110	A54	Ampe Quarry (Belgium)	Falun II	Nummulites aquitanicus	Egem Mbr - Hyon Fm	Top NP12	1.694	M+O+R+A	33.5	74.5861	1.98406	1.86824	0.880163	0.0596966
111	A55	Ampe Quarry (Belgium)	Falun II	Nummulites aquitanicus	Egem Mbr - Hyon Fm	Top NP12	1.606	M+O+R+A	33.5	77.043	2.11625	1.76036	1.00419	0.0803595

## Sheet: Reconstruction-Data
Nr	ID	Location	sample level	Nummulites species	Member-Formation	NP-zone	Preservation	Mg/Ca mmol/mol	Sr/Ca mmol/mol	Fe/Ca mmol/mol	Mn/Ca mmol/mol	Al/Ca mmol/mol	Temperature (°C)
1	Averaged	Ampe Quarry (Belgium)	Falun II	Nummulites aquitanicus	Egem Mbr - Hyon Fm	Top NP12	VG	77.4098	1.93718	4.47327	1.16205	0.167449	28.894		VG	Very good
2	Averaged	Ampe Quarry (Belgium)	Layer Nr17	Nummulites aquitanicus	Egem Mbr - Hyon Fm	Top NP12	VG	74.4479	1.92195	8.37465	2.00599	0.0559106	26.7638		G	Good
3	Averaged	Ampe Quarry (Belgium)	Falun I	Nummulites aquitanicus	Egem Mbr - Hyon Fm	Top NP12	VG	73.9831	1.89845	9.58139	2.00239	0.0419354	26.4244		M	Medium
4	K1	Kester core (Belgium)	31.3 m	Nummulites involutus	Mons-en-Pévèle Fm	Base NP12*	VB	11.5847	0.352001	5.819	1.77588	0.166013	-72.5373		B	Bad
5	K2	Kester core (Belgium)	31.82 m	Nummulites involutus	Mons-en-Pévèle Fm	Base NP12*	B	39.2894	1.40325	7.86574	4.70715	0.121883	-5.80131		VB	Very bad
6	K3	Kester core (Belgium)	33.74 m	Nummulites involutus	Mons-en-Pévèle Fm	Base NP12*	VG	71.3384	1.91924	1.51324	0.567992	0.130257	26.7932
7	K4	Kester core (Belgium)	33.93 m	Nummulites involutus	Mons-en-Pévèle Fm	Base NP12*	VG	65.7761	1.87685	2.22774	0.796368	0.164419	22.3572
8	K5	Kester core (Belgium)	42.5-42.57 m	Nummulites involutus	Mons-en-Pévèle Fm	Top NP11	VG	74.3579	1.90547	2.10588	0.891134	0.198499	29.0585
9	K6 = C	Kester core (Belgium)	42.95-43.00 m	Nummulites involutus	Mons-en-Pévèle Fm	Top NP11	VG	68.6912	1.84024	2.5709	1.15907	0.314861	24.7269
10	K7	Kester core (Belgium)	44.52-44.60 m	Nummulites involutus	Mons-en-Pévèle Fm	Top NP11	VB	26.1421	1.09017	18.8763	6.0283	0.253526	-28.064
11	K8	Kester core (Belgium)	44.90-45.00 m	Nummulites involutus	Mons-en-Pévèle Fm	Top NP11	VG	69.2368	1.80279	4.25952	2.85437	0.132355	25.1592
12	K9	Kester core (Belgium)	45.50 m	Nummulites involutus	Mons-en-Pévèle Fm	Top NP11	VG	68.8258	1.8575	1.88438	1.26385	0.274968	24.8338
13	K10	Kester core (Belgium)	45.90-46.00 m	Nummulites involutus	Mons-en-Pévèle Fm	Top NP11	VG	69.5774	1.84602	2.54109	1.62102	0.279325	25.4273
14	K11	Kester core (Belgium)	46.30-46.40 m	Nummulites involutus	Mons-en-Pévèle Fm	Top NP11	VG	67.3044	1.86013	2.09257	1.74275	0.265081	23.6124
15	K12	Kester core (Belgium)	46.50-46.60 m	Nummulites involutus	Mons-en-Pévèle Fm	Top NP11	VG	69.2375	1.89593	68.4275	0.531325	0.905033	25.1597
16	K13	Kester core (Belgium)	46.60-46.70 m	Nummulites involutus	Mons-en-Pévèle Fm	Top NP11	VG	66.6799	1.88104	2.14507	0.642424	0.256142	23.103
17	K14	Kester core (Belgium)	46.81-46.82 m	Nummulites involutus	Mons-en-Pévèle Fm	Top NP11	VG	70.9554	1.92486	2.56544	0.883637	0.505688	26.499
18	K15 = B	Kester core (Belgium)	46.92-46.95 m	Nummulites involutus	Mons-en-Pévèle Fm	Top NP11	VG	66.3327	1.88669	2.23432	0.89958	0.216288	22.8177
19	K16	Kester core (Belgium)	47.90-48.00 m	Nummulites involutus	Mons-en-Pévèle Fm	Top NP11	B	5.58325	1.03866	2.33108	3.91099	0.188464	-112.423
20	K17	Kester core (Belgium)	49.14 m	Nummulites involutus	Mons-en-Pévèle Fm	Top NP11	M	50.1903	1.6889	0.561591	0.889713	0.0224391	7.57935
21	K18	Kester core (Belgium)	49.63-49.70 m	Nummulites involutus	Mons-en-Pévèle Fm	Top NP11	M	51.7445	1.65959	2.17825	1.93174	0.179935	9.24588
22	K19	Kester core (Belgium)	49.85 m	Nummulites involutus	Mons-en-Pévèle Fm	Top NP11	M	49.7151	1.63065	1.16676	1.48808	0.153389	7.05956
23	K20	Kester core (Belgium)	50.15 m	Nummulites involutus	Mons-en-Pévèle Fm	Top NP11	VG	62.7987	1.84714	1.03833	1.3021	0.0828185	19.826
24	K21	Kester core (Belgium)	50.17 m	Nummulites involutus	Mons-en-Pévèle Fm	Top NP11	M	49.7142	1.63518	1.15311	1.46024	0.0526313	7.0585
25	K22	Kester core (Belgium)	50.78 m	Nummulites involutus	Mons-en-Pévèle Fm	Top NP11	VG	63.3732	1.84819	3.09993	1.51879	0.244373	20.3236
26	K24	Kester core (Belgium)	51.45-51.50 m	Nummulites involutus	Mons-en-Pévèle Fm	Top NP11	M-G	59.0075	1.77395	2.61203	2.9168	0.311346	16.4233
27	K26	Kester core (Belgium)	55.9-60.00 m	Nummulites involutus	Mons-en-Pévèle Fm	Top NP11	VG	68.7747	1.90851	2.37536	1.74629	0.248303	24.7933
28	K27	Kester core (Belgium)	56.84 m	Nummulites involutus	Mons-en-Pévèle Fm	Top NP11	VG	66.615	1.85856	3.78851	3.93228	0.162967	23.0498
29	K28	Kester core (Belgium)	57.15-57.20 m	Nummulites involutus	Mons-en-Pévèle Fm	Top NP11	VG	64.4603	1.82981	4.21041	3.74415	0.271004	21.253
30	K29	Kester core (Belgium)	57.53 m	Nummulites involutus	Mons-en-Pévèle Fm	Top NP11	M-G	56.6583	1.7279	6.01247	5.38401	0.272381	14.2032
31	K30	Kester core (Belgium)	58.50-58.60 m	Nummulites involutus	Mons-en-Pévèle Fm	Top NP11	VG	64.5963	1.85517	4.16346	1.87243	0.713384	21.3682
32	K31	Kester core (Belgium)	59.9-60.00 m	Nummulites involutus	Mons-en-Pévèle Fm	Top NP11	VG	69.0042	1.87736	8.47244	3.52031	0.629703	24.9753
33	K32	Kester core (Belgium)	60.80-60.90 m	Nummulites involutus	Mons-en-Pévèle Fm	Top NP11	VG	68.5615	1.87992	7.23161	3.12654	0.483392	24.6236
34	K33	Kester core (Belgium)	61.90 m	Nummulites involutus	Mons-en-Pévèle Fm	Top NP11	VB	10.413	0.994533	58.4311	6.09928	0.177836	-78.3644
